# Supplementary material
Source: publisher figshare collection journal article supplement (https://asha.figshare.com/ndownloader/files/39242759)
Supplement: Supplementary file 1 [file 39242759]

productionID	ID	Dx	Months.Post.Onset	Target	Production	Production.Orthographic	Code	Production.Unicode	Duplicates
1	BM0289	Anomic	5	ambulance			N	æmblɪns
2	BM0289	Anomic	5	binoculars			N	bɪnɑkjulirz
3	BM0289	Anomic	5	cannon		gun	M	ɡʌn
4	BM0289	Anomic	5	cheerleaders			N	tʃirlejərz
5	BM0289	Anomic	5	chimney			N	tʃɪmli
6	BM0289	Anomic	5	fan			N	fran
7	BM0289	Anomic	5	helicopter		shopper	F	ʃɑpər
8	BM0289	Anomic	5	lion		tiger	M	taɪɡər
9	BM0289	Anomic	5	pineapple			AN	brepfrut
10	BM0289	Anomic	5	pirate		parrot	F	pærət
11	BM0289	Anomic	5	plant		flowers	M	flaʊərz
12	BM0289	Anomic	5	queen		princess	S	prɪnsɛs
13	BM0289	Anomic	5	sailor			N	sætər
14	BM0289	Anomic	5	skull			N	skʌləkən
15	BM0289	Anomic	5	slippers		shoes	S	ʃuz
16	BM0289	Anomic	5	sock		stocking	M	stɑkɪn
17	BM0289	Anomic	5	stethoscope			N	stɛləskops
18	BM0289	Anomic	5	thermometer			N	ɵərmɑmɪmər
19	BM0289	Anomic	5	typewriter			N	taɪpərər
20	BM0289	Anomic	5	van		camper	M	kæmpər
21	BM0289	Anomic	5	vase		flowerpot	S	flaʊərpɑt
22	BM0289	Anomic	5	zebra		horse	S	hɔrs
23	BM0601	Wernicke	35	ambulance			AN	piænər
24	BM0601	Wernicke	35	anchor			AN	wɛlo
25	BM0601	Wernicke	35	basket		book	F	bʊk
26	BM0601	Wernicke	35	beard		beer	F	bir
27	BM0601	Wernicke	35	binoculars		glass	M	ɡlæs
28	BM0601	Wernicke	35	book		boat	F	bot
29	BM0601	Wernicke	35	boot			N	bots
30	BM0601	Wernicke	35	bottle			N	ɛmpəl
31	BM0601	Wernicke	35	bowl		cup	S	kʌp
32	BM0601	Wernicke	35	broom		bread	F	brɛd
33	BM0601	Wernicke	35	butterfly		banana	F	bənænə
34	BM0601	Wernicke	35	camel		bill	O	bɪl
35	BM0601	Wernicke	35	cannon			N	kænəd
36	BM0601	Wernicke	35	chimney			N	tʃɪno
37	BM0601	Wernicke	35	church		nun	S	nʌn
38	BM0601	Wernicke	35	clock		phone	O	fon
39	BM0601	Wernicke	35	comb		banana	O	bənænə
40	BM0601	Wernicke	35	corn		carrot	M	kærət
41	BM0601	Wernicke	35	cow		goat	S	ɡot
42	BM0601	Wernicke	35	cowboy			N	kaʊnk
43	BM0601	Wernicke	35	crown		king	M	kɪŋ
44	BM0601	Wernicke	35	crutches			N	kærəks
45	BM0601	Wernicke	35	dice			N	daɪts
46	BM0601	Wernicke	35	elephant			AN	ɡənu
47	BM0601	Wernicke	35	Eskimo			N	ɡos
48	BM0601	Wernicke	35	flashlight		fire	F	faɪr
49	BM0601	Wernicke	35	flower		fire	F	faɪr
50	BM0601	Wernicke	35	foot		fort	F	fɔrt
51	BM0601	Wernicke	35	fork			N	frok
52	BM0601	Wernicke	35	frog			N	rɑɡ
53	BM0601	Wernicke	35	glove		finger	S	fɪŋɡər
54	BM0601	Wernicke	35	harp		vine	O	vaɪn
55	BM0601	Wernicke	35	helicopter		airplane	M	erplen
56	BM0601	Wernicke	35	hose		water	S	wʌtər
57	BM0601	Wernicke	35	kitchen		telephone	F	tɛləfon
58	BM0601	Wernicke	35	knife		fork	S	fɔrk
59	BM0601	Wernicke	35	lamp		night	S	naɪt
60	BM0601	Wernicke	35	leaf		flake	F	flek
61	BM0601	Wernicke	35	lion			AN	krəmero
62	BM0601	Wernicke	35	microscope			N	θɛftskot
63	BM0601	Wernicke	35	mountain		game	O	ɡem
64	BM0601	Wernicke	35	nail		hammer	S	hæmər
65	BM0601	Wernicke	35	nurse		nun	F	nʌn
66	BM0601	Wernicke	35	owl			N	ræl
67	BM0601	Wernicke	35	pear		bear	F	ber
68	BM0601	Wernicke	35	pen		pin	F	pɪn
69	BM0601	Wernicke	35	pencil		number	O	nʌmbər
70	BM0601	Wernicke	35	pie		apple	S	æpəl
71	BM0601	Wernicke	35	pig		goat	S	ɡot
72	BM0601	Wernicke	35	pillow		bed	S	bɛd
73	BM0601	Wernicke	35	pirate			N	pəlærət
74	BM0601	Wernicke	35	plant		flower	M	flaʊər
75	BM0601	Wernicke	35	pumpkin		balloon	F	bəlun
76	BM0601	Wernicke	35	pyramid		tutu	O	tutu
77	BM0601	Wernicke	35	rake		wack	F	wæk
78	BM0601	Wernicke	35	saddle		horse	S	hɔrs
79	BM0601	Wernicke	35	sailor		flower	F	flaʊər
80	BM0601	Wernicke	35	saw		zoo	O	zu
81	BM0601	Wernicke	35	scarf		knife	F	naɪf
82	BM0601	Wernicke	35	scissors			N	tʃɪʃəs
83	BM0601	Wernicke	35	shoe		foot	S	fʊt
84	BM0601	Wernicke	35	skis			N	diz
85	BM0601	Wernicke	35	skull		gun	F	ɡʌn
86	BM0601	Wernicke	35	snake		stink	F	stɪnk
87	BM0601	Wernicke	35	spider		biter	F	baɪdər
88	BM0601	Wernicke	35	spoon		dish	S	dɪʃ
89	BM0601	Wernicke	35	squirrel			N	kraʊ
90	BM0601	Wernicke	35	star			AN	ɛks
91	BM0601	Wernicke	35	stethoscope			N	stɛkəkos
92	BM0601	Wernicke	35	strawberries		orange	S	ɑrəndʒ
93	BM0601	Wernicke	35	thermometer			N	θərmɑdərər
94	BM0601	Wernicke	35	towel		weights	F	wets
95	BM0601	Wernicke	35	tractor			N	trækər
96	BM0601	Wernicke	35	train			AN	mʌp
97	BM0601	Wernicke	35	turkey			N	ɡostər
98	BM0601	Wernicke	35	van		bus	S	bʌs
99	BM0601	Wernicke	35	volcano			N	vɑrɡo
100	BM0601	Wernicke	35	waterfall		tree	S	tri
101	BM0601	Wernicke	35	wig		hair	S	her
102	BM0601	Wernicke	35	zebra			N	dəzilo
103	LD0001	Anomic	1	binoculars			N	baɪnɑkjulər
104	LD0001	Anomic	1	bottle			N	bɑdo
105	LD0001	Anomic	1	camel			N	̩kæmpəl
106	LD0001	Anomic	1	dinosaur			N	daɪnosɔr
107	LD0001	Anomic	1	piano			N	pɑɪæno
108	LD0001	Anomic	1	ruler			N	wulər
109	LD0001	Anomic	1	saw			N	sɔn
110	LD0001	Anomic	1	scale		weight	M	wet
111	LD0001	Anomic	1	slippers		shoes	S	ʃuz	duplicate
112	LD0002	TCS	2	ambulance		police	M	pəlis
113	LD0002	TCS	2	anchor		seahook	S	sihʊk
114	LD0002	TCS	2	celery		asparagus	M	əsperəɡəs
115	LD0002	TCS	2	corn		hook	O	hʊk
116	LD0002	TCS	2	desk		chest	M	tʃɛs
117	LD0002	TCS	2	ghost		bat	M	bæt
118	LD0002	TCS	2	harp			AN	zibə
119	LD0002	TCS	2	heart		valentine	S	væləntaɪn
120	LD0002	TCS	2	hose		rope	O	rop
121	LD0002	TCS	2	lion		tiger	M	taɪɡər	duplicate
122	LD0002	TCS	2	microscope		telescope	S	tɛləskop
123	LD0002	TCS	2	necklace		jewelry	S	dʒulri
124	LD0002	TCS	2	seal		tiger	S	taɪɡər
125	LD0002	TCS	2	snail			AN	krɔsfɪʃ
126	LD0002	TCS	2	van		bus	S	bʌs	duplicate
127	LD0002	TCS	2	vase			N	tʃɛsp
128	LD0002	TCS	2	wig		head	S	hɛd
129	LD0003	Conduction	23	ambulance			N	æmbələnz
130	LD0003	Conduction	23	bell		ball	F	bɑl
131	LD0003	Conduction	23	bottle		battle	F	bædəl
132	LD0003	Conduction	23	bowl		ball	F	bɑl
133	LD0003	Conduction	23	bride		pry	F	praɪ
134	LD0003	Conduction	23	cake			N	klek
135	LD0003	Conduction	23	candle		light	S	laɪt
136	LD0003	Conduction	23	cane		can	F	kæn
137	LD0003	Conduction	23	celery		salary	F	sæləri
138	LD0003	Conduction	23	crutches		cartridge	F	kɑrtrɪdʒ
139	LD0003	Conduction	23	dragon		snake	S	snek
140	LD0003	Conduction	23	drum			N	trʌm
141	LD0003	Conduction	23	helicopter		hello	F	hɛlo
142	LD0003	Conduction	23	hose			N	fuz
143	LD0003	Conduction	23	microscope			N	tʌrəskop
144	LD0003	Conduction	23	pig		piglet	S	pɪɡlət
145	LD0003	Conduction	23	pillow			N	pulər
146	LD0003	Conduction	23	rake			N	raɪk
147	LD0003	Conduction	23	saddle			N	sɑdəl
148	LD0003	Conduction	23	sailor		silver	F	sɪlvər
149	LD0003	Conduction	23	skis		scarf	F	skɑrf
150	LD0003	Conduction	23	snail		snare	F	snær
151	LD0003	Conduction	23	snake		snack	F	snæk
152	LD0003	Conduction	23	stethoscope			N	pɛfərz
153	LD0003	Conduction	23	table		desk	S	dɛsk
154	LD0003	Conduction	23	thermometer			N	ɵərməstɔrə
155	LD0003	Conduction	23	toilet			N	tɑn
156	LD0003	Conduction	23	turkey			N	tɔki
157	LD0003	Conduction	23	vest			N	vɪst
158	LD0004	Conduction	20	anchor			N	æksə
159	LD0004	Conduction	20	beard		bird	F	bʌrd
160	LD0004	Conduction	20	binoculars			N	bənɑ
161	LD0004	Conduction	20	camel			N	kæmə
162	LD0004	Conduction	20	carrot			N	kæbut
163	LD0004	Conduction	20	dinosaur			N	daɪnə
164	LD0004	Conduction	20	dragon		firedragon	S	faɪrdræɡən
165	LD0004	Conduction	20	flashlight			N	laɪflæ
166	LD0004	Conduction	20	helicopter			N	hɛlɪkæp
167	LD0004	Conduction	20	horse		burr	F	bʌr
168	LD0004	Conduction	20	knife		fork	S	fɔrk	duplicate
169	LD0004	Conduction	20	letter			N	blɛdər
170	LD0004	Conduction	20	mustache		beard	S	bird
171	LD0004	Conduction	20	necklace		bracelet	M	breslət
172	LD0004	Conduction	20	octopus		squid	M	skwɪd
173	LD0004	Conduction	20	owl		bird	S	bʌrd
174	LD0004	Conduction	20	pineapple		cucumber	S	kjukʌmbər
175	LD0004	Conduction	20	saw			N	ʃɔ
176	LD0004	Conduction	20	seal		porpoise	S	pɔrpəs
177	LD0004	Conduction	20	skull		head	S	hɛd
178	LD0004	Conduction	20	slippers		shoe	S	ʃu
179	LD0004	Conduction	20	top		spinner	S	spɪnər
180	LD0004	Conduction	20	turkey		chicken	M	tʃɪkən
181	LD0004	Conduction	20	van		bus	S	bʌs	duplicate
182	LD0004	Conduction	20	volcano		mountain	S	maʊntən
183	LD0004	Conduction	20	well		water	M	wɔdər
184	LD0005	TCS	4	apple		strawberry	S	strɔbɛri
185	LD0005	TCS	4	baby		bib	M	bɪb
186	LD0005	TCS	4	binoculars		fan	F	fæn
187	LD0005	TCS	4	boot		shoe	M	ʃu
188	LD0005	TCS	4	bride		groom	M	ɡrum
189	LD0005	TCS	4	can		peas	S	piz
190	LD0005	TCS	4	cheerleaders		band	S	bænd
191	LD0005	TCS	4	clock		key	F	ki
192	LD0005	TCS	4	closet		compartment	F	kəmpɑrtmənt
193	LD0005	TCS	4	clown		fisherman	M	fɪʃərmən
194	LD0005	TCS	4	corn		carrot	M	kærət	duplicate
195	LD0005	TCS	4	crutches		key	F	ki
196	LD0005	TCS	4	Eskimo		ghost	M	ɡost
197	LD0005	TCS	4	fan		map	F	mæp
198	LD0005	TCS	4	fireplace		strawberry	F	strɔbɛri
199	LD0005	TCS	4	flower		daisy	S	dezi
200	LD0005	TCS	4	hair		wig	S	wɪɡ
201	LD0005	TCS	4	helicopter		fishtank	F	fɪʃtæŋk
202	LD0005	TCS	4	iron		fan	F	fæn
203	LD0005	TCS	4	microscope		test	S	tɛst
204	LD0005	TCS	4	monkey		lioness	S	laɪənəs
205	LD0005	TCS	4	nail		win	O	wɪn
206	LD0005	TCS	4	necklace		tiara	S	tiɑrə
207	LD0005	TCS	4	pillow		pen	F	pɛn
208	LD0005	TCS	4	pirate		newspaper	F	nuzpepər
209	LD0005	TCS	4	pyramid		museum	M	mjuziəm
210	LD0005	TCS	4	sandwich		sand	F	sænd
211	LD0005	TCS	4	scale		brush	O	brʌʃ
212	LD0005	TCS	4	skis		trail	S	trel
213	LD0005	TCS	4	slippers		foot	S	fʊt
214	LD0005	TCS	4	sun		sunrise	S	sʌnraɪz
215	LD0005	TCS	4	tent		ambulance	F	æmbjələns
216	LD0005	TCS	4	train			AN	kwinkwæ
217	LD0005	TCS	4	vest		helmet	M	hɛlmət
218	LD0005	TCS	4	wig		crown	O	kraʊn
219	LD0006	Wernicke	4	bowl		cup	S	kʌp	duplicate
220	LD0006	Wernicke	4	camel		camp	F	kæmp
221	LD0006	Wernicke	4	candle		can	F	kæn
222	LD0006	Wernicke	4	cane		candle	F	kændəl
223	LD0006	Wernicke	4	carrot			N	kærə
224	LD0006	Wernicke	4	cat		kitty	M	kɪti
225	LD0006	Wernicke	4	chair		table	S	tebəl
226	LD0006	Wernicke	4	clown		clone	F	klon
227	LD0006	Wernicke	4	comb			AN	æpməl
228	LD0006	Wernicke	4	corn		car	F	kɑr
229	LD0006	Wernicke	4	cow		dog	S	dɔɡ
230	LD0006	Wernicke	4	door			AN	stovər
231	LD0006	Wernicke	4	duck			N	dek
232	LD0006	Wernicke	4	flashlight		lighter	S	laɪdər
233	LD0006	Wernicke	4	foot		woosh	F	wʊʃ
234	LD0006	Wernicke	4	ghost		suit	F	sut
235	LD0006	Wernicke	4	glass		cup	S	kʌp
236	LD0006	Wernicke	4	goat			N	dæt
237	LD0006	Wernicke	4	grapes		apple	S	æpəl
238	LD0006	Wernicke	4	harp		food	O	fud
239	LD0006	Wernicke	4	iron		key	O	ki
240	LD0006	Wernicke	4	kitchen		kitten	F	kɪtən
241	LD0006	Wernicke	4	kite		flag	S	flæɡ
242	LD0006	Wernicke	4	leaf			N	lɛf
243	LD0006	Wernicke	4	letter		reading	S	ridɪŋ
244	LD0006	Wernicke	4	lion		iamb	F	aɪəm
245	LD0006	Wernicke	4	nail		knee	F	ni
246	LD0006	Wernicke	4	necklace		jewelry	M	dʒɛləri
247	LD0006	Wernicke	4	nurse		ass	F	æs
248	LD0006	Wernicke	4	owl			N	bæl
249	LD0006	Wernicke	4	pyramid			N	mirəd
250	LD0006	Wernicke	4	queen		lady	S	ledi
251	LD0006	Wernicke	4	rake		rate	F	ret
252	LD0006	Wernicke	4	ring		necklace	S	nɛkləs
253	LD0006	Wernicke	4	skull			N	skɛltən
254	LD0006	Wernicke	4	sock		coat	S	kot
255	LD0006	Wernicke	4	squirrel			AN	bʌnət
256	LD0006	Wernicke	4	star		heart	F	hɑrt
257	LD0006	Wernicke	4	toilet		bathroom	S	bæɵrum
258	LD0006	Wernicke	4	tree		tore	F	tɔr
259	LD0006	Wernicke	4	van		bus	S	bʌs	duplicate
260	LD0006	Wernicke	4	vase			AN	dɛɡər
261	LD0006	Wernicke	4	vest		rest	F	rɛst
262	LD0006	Wernicke	4	window		winter	F	wɪntər
263	LD0006	Wernicke	4	zebra			N	zebrə
264	LD0007	Anomic	10	balloon			N	lʌbəlun
265	LD0007	Anomic	10	banana			N	nəmænə
266	LD0007	Anomic	10	beard		mask	O	mæsk
267	LD0007	Anomic	10	binoculars			N	bɛɡnɑkudərz
268	LD0007	Anomic	10	can			N	kænəl
269	LD0007	Anomic	10	cannon		cannonball	S	cænənbɑl
270	LD0007	Anomic	10	chair			N	tʃɑ
271	LD0007	Anomic	10	cheerleaders			N	tʃirledərz
272	LD0007	Anomic	10	cross			N	ɡrɛŋk
273	LD0007	Anomic	10	crown			N	kre
274	LD0007	Anomic	10	dinosaur		animal	M	ænəməl
275	LD0007	Anomic	10	dragon			AN	nɑ
276	LD0007	Anomic	10	eye		why	F	waɪ
277	LD0007	Anomic	10	flashlight		light	S	laɪt
278	LD0007	Anomic	10	helicopter			N	haɪərkɑptər
279	LD0007	Anomic	10	iron		ironing	S	aɪərnɪŋ
280	LD0007	Anomic	10	mustache		gnash	F	næʃ
281	LD0007	Anomic	10	octopus		squid	M	skwɪd	duplicate
282	LD0007	Anomic	10	pig		piggy	S	pɪɡi
283	LD0007	Anomic	10	plant			N	prɪndʒə
284	LD0007	Anomic	10	pyramid			N	mɪrəmɪd
285	LD0007	Anomic	10	skis		seize	F	siz
286	LD0007	Anomic	10	skull			N	skʌln
287	LD0007	Anomic	10	stethoscope			N	skɛɵəskup
288	LD0007	Anomic	10	sun		sunburst	S	sʌnbʌrst
289	LD0007	Anomic	10	thermometer			N	ɵʌmbɑmədər
290	LD0007	Anomic	10	train			N	təræ
291	LD0007	Anomic	10	van		bus	S	bʌs	duplicate
292	LD0007	Anomic	10	wig		hairdo	S	herdu
293	LD0008	Anomic	12	bat		tap	F	tæp
294	LD0008	Anomic	12	chair		table	M	tebəl
295	LD0008	Anomic	12	dinosaur			N	daɪnəs
296	LD0008	Anomic	12	harp		xylophone	S	zaɪləfon
297	LD0008	Anomic	12	microscope		telescope	S	tɛləskop	duplicate
298	LD0008	Anomic	12	necklace		bracelet	M	breslət	duplicate
299	LD0008	Anomic	12	slippers		slip	F	slɪp
300	LD0008	Anomic	12	strawberries		pears	S	pɛrz
301	LD0008	Anomic	12	volcano			N	vɔkæno
302	LD0008	Anomic	12	wig		hair	S	her	duplicate
303	LD0008	Anomic	12	zipper		chain	O	tʃen
304	LD0010	Anomic	6	bat		scarecrow	S	skerkro
305	LD0010	Anomic	6	bowl		glass	S	ɡlæs
306	LD0010	Anomic	6	closet		dresser	S	drɛsər
307	LD0010	Anomic	6	fish		shark	S	ʃɑrk
308	LD0010	Anomic	6	football		NFL	S	ɛnɛfɛl
309	LD0010	Anomic	6	hose		water	S	wɔdər
310	LD0010	Anomic	6	map		calendar	M	kæləndər
311	LD0010	Anomic	6	pillow		bag	O	bæɡ
312	LD0010	Anomic	6	plant		flowers	M	flaʊərz	duplicate
313	LD0010	Anomic	6	sailor		man	S	mæn
314	LD0010	Anomic	6	skull		skeleton	M	skɛlətən
315	LD0010	Anomic	6	slippers		shoes	S	ʃuz	duplicate
316	LD0010	Anomic	6	stethoscope			N	dɛsɵəskop
317	LD0010	Anomic	6	table		desk	S	dɛsk	duplicate
318	LD0010	Anomic	6	turkey		crow	M	kro
319	LD0010	Anomic	6	waterfall		bridge	O	brɪdʒ
320	LD0011	Conduction	3	ambulance		truck	S	trʌk
321	LD0011	Conduction	3	beard		house	O	haʊs
322	LD0011	Conduction	3	belt		bilk	F	bɪlk
323	LD0011	Conduction	3	binoculars			N	bənɑkəbərz
324	LD0011	Conduction	3	book		bisque	F	bɪsk
325	LD0011	Conduction	3	boot		moot	F	mut
326	LD0011	Conduction	3	bottle		ball	F	bɑl
327	LD0011	Conduction	3	bowl		ball	F	bɑl	duplicate
328	LD0011	Conduction	3	bride		maids	M	medz
329	LD0011	Conduction	3	butterfly			N	blʌbəbædər
330	LD0011	Conduction	3	calendar			N	kædo
331	LD0011	Conduction	3	camel			N	hæməl
332	LD0011	Conduction	3	candle			N	læmbər
333	LD0011	Conduction	3	cane		hand	F	hænd
334	LD0011	Conduction	3	carrot			N	terət
335	LD0011	Conduction	3	celery		salary	F	sæləri	duplicate
336	LD0011	Conduction	3	chair		chap	F	tʃæp
337	LD0011	Conduction	3	cheerleaders			N	elekərz
338	LD0011	Conduction	3	chimney		window	M	wɪndo
339	LD0011	Conduction	3	cow		bear	S	ber
340	LD0011	Conduction	3	cowboy		western	S	wɛstərn
341	LD0011	Conduction	3	dinosaur			N	ðəsɔrəs
342	LD0011	Conduction	3	drum		dumb	F	dʌm
343	LD0011	Conduction	3	elephant			N	ɛləməs
344	LD0011	Conduction	3	Eskimo			N	hæskəmu
345	LD0011	Conduction	3	fireplace			AN	hænəl
346	LD0011	Conduction	3	flashlight		glass	F	ɡlæs
347	LD0011	Conduction	3	garage			N	pɑrkɔrt
348	LD0011	Conduction	3	ghost		goose	F	ɡus
349	LD0011	Conduction	3	grapes		bushes	S	bʊʃəz
350	LD0011	Conduction	3	helicopter		telegraph	F	tɛləɡræf
351	LD0011	Conduction	3	hose		hoe	F	ho
352	LD0011	Conduction	3	iron			N	aɪrən
353	LD0011	Conduction	3	knife		nail	F	nel
354	LD0011	Conduction	3	map			N	tædələs
355	LD0011	Conduction	3	mountain			AN	piri
356	LD0011	Conduction	3	mustache			N	pəstæʃ
357	LD0011	Conduction	3	nose			N	nəhoz
358	LD0011	Conduction	3	pen		pencil	M	pɛnsəl
359	LD0011	Conduction	3	piano			N	piəjæ
360	LD0011	Conduction	3	pig		pill	F	pɪl
361	LD0011	Conduction	3	pineapple		cannibal	F	kænəbəl
362	LD0011	Conduction	3	pipe		pup	F	pʌp
363	LD0011	Conduction	3	plant		fruit	M	frut
364	LD0011	Conduction	3	pumpkin			N	mʌpəs
365	LD0011	Conduction	3	pyramid			N	mʌrd
366	LD0011	Conduction	3	rake		hoe	S	ho
367	LD0011	Conduction	3	rope		robe	F	rob
368	LD0011	Conduction	3	ruler			N	wulər	duplicate
369	LD0011	Conduction	3	saddle			N	sælə
370	LD0011	Conduction	3	scarf			N	skʌrf
371	LD0011	Conduction	3	shoe		foot	S	fʊt	duplicate
372	LD0011	Conduction	3	slippers		sippers	F	sɪpərz
373	LD0011	Conduction	3	spider			N	spɛnər
374	LD0011	Conduction	3	star		car	F	kɑr
375	LD0011	Conduction	3	stethoscope			N	stɛntəkɑ
376	LD0011	Conduction	3	thermometer			N	lɑmɑdədər
377	LD0011	Conduction	3	towel		napkin	S	næpkɪn
378	LD0011	Conduction	3	tractor			N	taʊ
379	LD0011	Conduction	3	train			N	tril
380	LD0011	Conduction	3	tree		TRUE	F	tru
381	LD0011	Conduction	3	typewriter			N	taɪpkaɪdər
382	LD0011	Conduction	3	van			AN	bus
383	LD0011	Conduction	3	volcano		Alp	S	ælp
384	LD0011	Conduction	3	waterfall			N	fɔlwɔ
385	LD0011	Conduction	3	well		will	F	wɪl
386	LD0011	Conduction	3	whistle		bell	S	bɛl
387	LD0011	Conduction	3	zebra		donkey	S	dɔŋki
388	LD0012	Anomic	4	cannon		wagon	F	wæɡən
389	LD0012	Anomic	4	chimney			N	tʃɪməli
390	LD0012	Anomic	4	church		house	S	haʊs
391	LD0012	Anomic	4	glove		hand	S	hænd
392	LD0012	Anomic	4	helicopter		airplane	M	erplen	duplicate
393	LD0012	Anomic	4	lion			N	laɪnjən
394	LD0012	Anomic	4	microscope			N	tɛktəskop
395	LD0012	Anomic	4	nail		kneel	F	nil
396	LD0012	Anomic	4	skull			N	skɛləkən
397	LD0012	Anomic	4	thermometer			N	təmɑnədʒə
398	LD0012	Anomic	4	van		bus	S	bʌs	duplicate
399	LD0012	Anomic	4	volcano			N	bokænə
400	LD0012	Anomic	4	wig		hair	S	her	duplicate
401	LD0013	Broca	32	ambulance			N	æmblilɛns
402	LD0013	Broca	32	balloon			N	pəlun
403	LD0013	Broca	32	basket			N	bæstət
404	LD0013	Broca	32	binoculars			N	bɪnɑkulərz
405	LD0013	Broca	32	butterfly			N	bʌdiflaɪ
406	LD0013	Broca	32	calendar			N	dæləndər
407	LD0013	Broca	32	camera			N	kæmər
408	LD0013	Broca	32	carrot			N	dærət
409	LD0013	Broca	32	chimney			N	tʃɪmədi
410	LD0013	Broca	32	church			N	ʃʌrtʃ
411	LD0013	Broca	32	crutches			N	krʌstəz
412	LD0013	Broca	32	desk		decks	F	dɛks
413	LD0013	Broca	32	dinosaur			N	daɪnitʃɔr
414	LD0013	Broca	32	dragon			N	ɡræɡən
415	LD0013	Broca	32	drum			N	ɡrʌm
416	LD0013	Broca	32	Eskimo			N	ɛstimo
417	LD0013	Broca	32	fireplace			N	faɪrpes
418	LD0013	Broca	32	flashlight			N	flæstlaɪt
419	LD0013	Broca	32	football			N	pʊtbɔl
420	LD0013	Broca	32	fork			N	bɔrtʃ
421	LD0013	Broca	32	garage			N	ɡərɑtʃ
422	LD0013	Broca	32	ghost			N	ɡotst
423	LD0013	Broca	32	glass			N	ɡlæst
424	LD0013	Broca	32	grapes			N	ɡrepst
425	LD0013	Broca	32	helicopter			N	hʌləkɑpər
426	LD0013	Broca	32	iron			N	aɪnərz
427	LD0013	Broca	32	knife			N	nef
428	LD0013	Broca	32	lamp		clamp	F	klæmp
429	LD0013	Broca	32	leaf		leave	F	liv
430	LD0013	Broca	32	lion			N	laɪnən
431	LD0013	Broca	32	man		ban	F	bæn
432	LD0013	Broca	32	mountain			N	haʊtən
433	LD0013	Broca	32	mustache			N	bəstæʃ
434	LD0013	Broca	32	necklace			N	lɪkləst
435	LD0013	Broca	32	nurse			N	dʒʌrst
436	LD0013	Broca	32	saddle		tattle	F	tædəl
437	LD0013	Broca	32	sandwich			N	tʃændwɪst
438	LD0013	Broca	32	scale		stale	F	stel
439	LD0013	Broca	32	scissors			N	stɪtʃərz
440	LD0013	Broca	32	skis		sees	F	siz	duplicate
441	LD0013	Broca	32	slippers		shoes	S	ʃus
442	LD0013	Broca	32	snail		shale	F	ʃel
443	LD0013	Broca	32	sock		stocks	F	stɑks
444	LD0013	Broca	32	spider			N	baɪdər
445	LD0013	Broca	32	squirrel		swirl	F	swʌrl
446	LD0013	Broca	32	star		scar	F	skɑr
447	LD0013	Broca	32	stethoscope			N	sɛstəkop
448	LD0013	Broca	32	strawberries			N	trɔberiz
449	LD0013	Broca	32	suit			N	tʃut
450	LD0013	Broca	32	thermometer			N	tɛrmɑmətʃər
451	LD0013	Broca	32	typewriter			N	taɪpelər
452	LD0013	Broca	32	van		ban	F	bæn
453	LD0013	Broca	32	vase		jar	S	dɑr
454	LD0013	Broca	32	vest		fest	F	fɛst
455	LD0013	Broca	32	wig		hair	S	her	duplicate
456	LD0013	Broca	32	zebra			N	tribə
457	LD0013	Broca	32	zipper			N	fɪp
458	LD0014	Conduction	5	anchor			N	æŋɡo
459	LD0014	Conduction	5	boot		galoshes	S	ɡəlɑʃəz
460	LD0014	Conduction	5	bowl		cup	S	kʌp	duplicate
461	LD0014	Conduction	5	broom		bloom	F	blum
462	LD0014	Conduction	5	butterfly		butter	F	bʌdər
463	LD0014	Conduction	5	calendar			N	kælənər
464	LD0014	Conduction	5	camel			N	kæmbəl
465	LD0014	Conduction	5	dinosaur			AN	hɑpə
466	LD0014	Conduction	5	ear		hear	M	hir
467	LD0014	Conduction	5	flower		fly	F	flaɪ
468	LD0014	Conduction	5	helicopter		plane	M	plen
469	LD0014	Conduction	5	house		home	M	hom
470	LD0014	Conduction	5	pillow			N	pɪliər
471	LD0014	Conduction	5	plant		flower	M	flaʊər	duplicate
472	LD0014	Conduction	5	seal		whale	M	wel
473	LD0014	Conduction	5	skull		skeleton	M	skɛlətən	duplicate
474	LD0014	Conduction	5	thermometer			N	ɵʌrmɑdər
475	LD0015	Broca	5	cheerleaders			N	tʃirliəz
476	LD0015	Broca	5	dragon		dinosaur	M	daɪnəsɔr
477	LD0015	Broca	5	helicopter		airplane	M	erplen	duplicate
478	LD0015	Broca	5	pen		pencil	M	pɛnsəl	duplicate
479	LD0015	Broca	5	wig		hair	S	her	duplicate
480	LD0016	Conduction	43	anchor		hanker	F	hæŋkər
481	LD0016	Conduction	43	baby		kid	S	kɪd
482	LD0016	Conduction	43	ball			N	bɔrs
483	LD0016	Conduction	43	bed			N	ɡɛd
484	LD0016	Conduction	43	belt		bench	F	bɛntʃ
485	LD0016	Conduction	43	bottle			N	blɑtəl
486	LD0016	Conduction	43	bowl			N	bok
487	LD0016	Conduction	43	bride			N	kraɪən
488	LD0016	Conduction	43	bridge		broom	F	brum
489	LD0016	Conduction	43	broom			AN	sʌs
490	LD0016	Conduction	43	candle		tan	F	tæn
491	LD0016	Conduction	43	cannon		camel	F	kæməl
492	LD0016	Conduction	43	celery			N	sɛlərɛri
493	LD0016	Conduction	43	cheerleaders			N	triərs
494	LD0016	Conduction	43	closet		clot	F	klɑt
495	LD0016	Conduction	43	cowboy		man	S	mæn
496	LD0016	Conduction	43	cross			N	kɑrs
497	LD0016	Conduction	43	dinosaur			N	daɪnəs	duplicate
498	LD0016	Conduction	43	drum		horse	O	hɔrs
499	LD0016	Conduction	43	frog		far	F	fɑr
500	LD0016	Conduction	43	glass		house	F	haʊs
501	LD0016	Conduction	43	goat			N	dof
502	LD0016	Conduction	43	harp		lyre	M	laɪr
503	LD0016	Conduction	43	hat			N	haʊt
504	LD0016	Conduction	43	kite		tyke	F	taɪk
505	LD0016	Conduction	43	knife		hat	O	hæt
506	LD0016	Conduction	43	leaf			N	wif
507	LD0016	Conduction	43	mustache			N	smʌns
508	LD0016	Conduction	43	octopus			N	ɑktəpʌ
509	LD0016	Conduction	43	pen		pay	F	pe
510	LD0016	Conduction	43	pillow		pitcher	F	pɪtʃər
511	LD0016	Conduction	43	pineapple			N	paɪnəmə
512	LD0016	Conduction	43	pipe		cup	F	kʌp
513	LD0016	Conduction	43	plant		clamp	F	klæmp
514	LD0016	Conduction	43	pumpkin			N	pʌmpkəl
515	LD0016	Conduction	43	pyramid			N	tirəməs
516	LD0016	Conduction	43	ruler			N	kulk
517	LD0016	Conduction	43	saddle		cattle	F	kædəl
518	LD0016	Conduction	43	saw			N	skrɔs
519	LD0016	Conduction	43	scarf			N	skʌlf
520	LD0016	Conduction	43	skis		skeet	F	skit
521	LD0016	Conduction	43	slippers			N	slɪsərz
522	LD0016	Conduction	43	snake		scale	F	skel
523	LD0016	Conduction	43	sock			N	kraʊs
524	LD0016	Conduction	43	spider			N	skaɪrə
525	LD0016	Conduction	43	spoon		sick	F	sɪk
526	LD0016	Conduction	43	squirrel			N	skʌr
527	LD0016	Conduction	43	star			N	hɑr
528	LD0016	Conduction	43	suit			N	suv
529	LD0016	Conduction	43	table		tare	F	ter
530	LD0016	Conduction	43	thermometer			N	təmʌrmər
531	LD0016	Conduction	43	towel		trowel	F	traʊəl
532	LD0016	Conduction	43	tractor			N	kræktər
533	LD0016	Conduction	43	typewriter			N	taɪræktər
534	LD0016	Conduction	43	van		bus	S	bʌs	duplicate
535	LD0016	Conduction	43	vest			N	vɛs	duplicate
536	LD0016	Conduction	43	volcano			N	vɑlno
537	LD0016	Conduction	43	wagon			N	kænət
538	LD0016	Conduction	43	wig		hairpiece	S	herpis
539	LD0016	Conduction	43	window		house	S	haʊs
540	LD0016	Conduction	43	zebra		horse	S	hɔrs	duplicate
541	LD0016	Conduction	43	zipper		slipper	F	slɪpər
542	LD0017	Broca	12	apple		orange	S	ɑrəndʒ
543	LD0017	Broca	12	banana		apple	S	æpəl
544	LD0017	Broca	12	belt		socks	S	sɑks
545	LD0017	Broca	12	bench		chair	S	tʃer
546	LD0017	Broca	12	binoculars			AN	maɪfəfɑdz
547	LD0017	Broca	12	boot		shoes	M	ʃuz
548	LD0017	Broca	12	bowl		tangle	F	tæŋɡəl
549	LD0017	Broca	12	bridge			N	traɪŋ
550	LD0017	Broca	12	butterfly		flower	M	flaʊər
551	LD0017	Broca	12	calendar		caliber	F	kæləbər
552	LD0017	Broca	12	camera		lights	S	laɪts
553	LD0017	Broca	12	can		balloon	F	bəlun
554	LD0017	Broca	12	candle		tight	O	tɑɪt
555	LD0017	Broca	12	cane			N	ke
556	LD0017	Broca	12	celery		lettuce	M	lɛtəs
557	LD0017	Broca	12	closet		clothesline	F	kloðzlaɪn
558	LD0017	Broca	12	comb		hair	S	her
559	LD0017	Broca	12	corn		train	F	tren
560	LD0017	Broca	12	cow		wake	O	wek
561	LD0017	Broca	12	cross		church	S	tʃʌrtʃ
562	LD0017	Broca	12	crown			AN	ve
563	LD0017	Broca	12	dragon		alligator	M	æləɡetər
564	LD0017	Broca	12	eye		ire	F	aɪər
565	LD0017	Broca	12	fireplace			N	flaɪs
566	LD0017	Broca	12	flashlight		flag	F	flæɡ
567	LD0017	Broca	12	flower		flag	F	flæɡ
568	LD0017	Broca	12	foot		socks	S	sɑks
569	LD0017	Broca	12	fork		spoon	S	spun
570	LD0017	Broca	12	ghost		me	O	mi
571	LD0017	Broca	12	glass		water	S	wɔdər
572	LD0017	Broca	12	grapes		rape	F	rep
573	LD0017	Broca	12	hammer		knife	O	naɪf
574	LD0017	Broca	12	harp			AN	aɪləfon
575	LD0017	Broca	12	hat			N	hænt
576	LD0017	Broca	12	helicopter		airplane	M	erplen	duplicate
577	LD0017	Broca	12	hose		snows	F	snoz
578	LD0017	Broca	12	man		tie	S	taɪ
579	LD0017	Broca	12	map			N	æbə
580	LD0017	Broca	12	monkey		elephant	S	ɛləfənt
581	LD0017	Broca	12	mustache		goatee	M	ɡoti
582	LD0017	Broca	12	necklace		jewelry	S	dʒulri	duplicate
583	LD0017	Broca	12	octopus		nostril	F	nɑstrəl
584	LD0017	Broca	12	pear		orange	S	ɑrəndʒ
585	LD0017	Broca	12	pen		pencil	M	pɛnsəl	duplicate
586	LD0017	Broca	12	pencil			AN	julu
587	LD0017	Broca	12	pig		big	F	bɪɡ
588	LD0017	Broca	12	pineapple		orange	S	ɑrəndʒ
589	LD0017	Broca	12	plant			AN	vaɪvə
590	LD0017	Broca	12	pyramid			N	mirəmət
591	LD0017	Broca	12	queen			AN	wʌk
592	LD0017	Broca	12	rope		me	O	mi
593	LD0017	Broca	12	ruler		scissors	S	sɪzərz
594	LD0017	Broca	12	saddle		rope	S	rop
595	LD0017	Broca	12	sailor		flag	S	flæɡ
596	LD0017	Broca	12	saw			N	tɔ
597	LD0017	Broca	12	scale		weight	M	wet	duplicate
598	LD0017	Broca	12	scarf			N	skof
599	LD0017	Broca	12	seal		wheel	F	wil
600	LD0017	Broca	12	slippers		socks	M	sɑks
601	LD0017	Broca	12	spider		way	O	we
602	LD0017	Broca	12	strawberries		orange	S	ɑrəndʒ	duplicate
603	LD0017	Broca	12	suit		clothes	S	kloðz
604	LD0017	Broca	12	table			N	tɑbət
605	LD0017	Broca	12	tent		tight	F	taɪt
606	LD0017	Broca	12	toilet			N	kolət
607	LD0017	Broca	12	van			N	ve
608	LD0017	Broca	12	vase			N	vɛz
609	LD0017	Broca	12	wig		hair	S	her	duplicate
610	LD0017	Broca	12	window		door	S	dɔr
611	LD0017	Broca	12	zebra			AN	rætsərə
612	LD0017	Broca	12	zipper		scissors	F	sɪzərz
613	LD0019	Anomic	1	apple		fruit	S	frut
614	LD0019	Anomic	1	belt		wallet	M	wɑlət
615	LD0019	Anomic	1	bowl		vase	S	ves
616	LD0019	Anomic	1	bus		truck	M	trʌk
617	LD0019	Anomic	1	cake		pie	S	paɪ
618	LD0019	Anomic	1	camel		donkey	S	dɔŋki
619	LD0019	Anomic	1	camera		photograph	M	fodəɡræf
620	LD0019	Anomic	1	can		jar	S	dʒɑr
621	LD0019	Anomic	1	cannon		gun	M	ɡʌn	duplicate
622	LD0019	Anomic	1	cat		animal	M	ænəməl
623	LD0019	Anomic	1	corn		fruit	S	frut
624	LD0019	Anomic	1	desk		table	S	tebəl
625	LD0019	Anomic	1	duck		animal	S	ænəməl
626	LD0019	Anomic	1	elephant		horse	S	hɔrs
627	LD0019	Anomic	1	Eskimo		iceman	M	aɪsmæn
628	LD0019	Anomic	1	fireman		firefighter	S	faɪrfaɪdər
629	LD0019	Anomic	1	foot		leg	S	lɛɡ
630	LD0019	Anomic	1	frog		animal	S	ænəməl
631	LD0019	Anomic	1	glass		cup	S	kʌp	duplicate
632	LD0019	Anomic	1	glove		hand	S	hænd	duplicate
633	LD0019	Anomic	1	grapes		fruit	M	frut
634	LD0019	Anomic	1	hammer		axe	M	æks
635	LD0019	Anomic	1	lamp		light	M	laɪt
636	LD0019	Anomic	1	leaf		flower	M	flaʊər
637	LD0019	Anomic	1	mountain		hill	S	hɪl
638	LD0019	Anomic	1	necklace			N	trɪnklət
639	LD0019	Anomic	1	nurse		lady	S	ledi
640	LD0019	Anomic	1	pillow			AN	dʒækən
641	LD0019	Anomic	1	pirate		warrior	S	wɔriər
642	LD0019	Anomic	1	saddle		horse	S	hɔrs	duplicate
643	LD0019	Anomic	1	sailor		soldier	M	soldʒər
644	LD0019	Anomic	1	saw		socks	F	sɑks
645	LD0019	Anomic	1	scale		table	F	tebəl
646	LD0019	Anomic	1	seal		animal	S	ænəməl
647	LD0019	Anomic	1	skull		head	S	hɛd	duplicate
648	LD0019	Anomic	1	slippers		sandals	M	sændəlz
649	LD0019	Anomic	1	snail		snake	M	snek
650	LD0019	Anomic	1	sock		boot	S	but
651	LD0019	Anomic	1	spoon		fork	S	fɔrk
652	LD0019	Anomic	1	squirrel		raccoon	M	rækun
653	LD0019	Anomic	1	strawberries		fruit	M	frut
654	LD0019	Anomic	1	top		cone	O	kon
655	LD0019	Anomic	1	towel			AN	næpɪn
656	LD0019	Anomic	1	tractor		truck	M	trʌk
657	LD0019	Anomic	1	turkey		fowl	S	faʊl
658	LD0019	Anomic	1	vase		basin	M	besən
659	LD0019	Anomic	1	vest		jacket	M	dʒækət
660	LD0019	Anomic	1	volcano		avalanche	M	ævəlæntʃ
661	LD0019	Anomic	1	wagon		pulley	O	pʊli
662	LD0019	Anomic	1	zebra		horse	S	hɔrs	duplicate
663	LD0020	Wernicke	2	ambulance			N	æmbələn
664	LD0020	Wernicke	2	balloon		boon	F	bun
665	LD0020	Wernicke	2	bone		banana	F	bənænə
666	LD0020	Wernicke	2	butterfly			N	bʌdərsaɪ
667	LD0020	Wernicke	2	camera		border	O	bɔrdər
668	LD0020	Wernicke	2	candle			N	klæ
669	LD0020	Wernicke	2	chimney		building	M	bɪldɪŋ
670	LD0020	Wernicke	2	cow		bull	S	bʌl
671	LD0020	Wernicke	2	crown		clown	F	klaʊn
672	LD0020	Wernicke	2	desk		watt	O	wɑt
673	LD0020	Wernicke	2	dice			N	des
674	LD0020	Wernicke	2	dinosaur		anteater	M	æntidər
675	LD0020	Wernicke	2	dog		duck	M	dʌk
676	LD0020	Wernicke	2	flashlight			N	flæʃməlaɪt
677	LD0020	Wernicke	2	fork		thing	O	ɵɪŋ
678	LD0020	Wernicke	2	frog		bullfrog	S	bʌlfrɔɡ
679	LD0020	Wernicke	2	garage		carport	M	kɑrpɔrt
680	LD0020	Wernicke	2	helicopter		airplane	M	erplen	duplicate
681	LD0020	Wernicke	2	mountain			AN	snæk
682	LD0020	Wernicke	2	mustache			N	sɑs
683	LD0020	Wernicke	2	nose		string	O	strɪŋ
684	LD0020	Wernicke	2	pillow		watch	O	wɑtʃ
685	LD0020	Wernicke	2	pirate			N	pɑrɡət
686	LD0020	Wernicke	2	pyramid		finks	F	fɪŋks
687	LD0020	Wernicke	2	ruler			AN	hɑrmɑnəɡɪd
688	LD0020	Wernicke	2	seal		zeal	F	zil
689	LD0020	Wernicke	2	skull		skeleton	M	skɛlətən	duplicate
690	LD0020	Wernicke	2	slippers		loafers	M	lofərz
691	LD0020	Wernicke	2	snail		eel	M	il
692	LD0020	Wernicke	2	snake		rattlesnake	S	rædəlsnek
693	LD0020	Wernicke	2	spider			N	spaɪə
694	LD0020	Wernicke	2	stethoscope			N	ɵɛdəskop
695	LD0020	Wernicke	2	suit		tuxedo	M	təksido
696	LD0020	Wernicke	2	sun		doily	O	dɔɪli
697	LD0020	Wernicke	2	thermometer			N	ɵɑmədər
698	LD0020	Wernicke	2	top		cop	F	kɑp
699	LD0020	Wernicke	2	zebra			AN	deŋki
700	LD0021	Conduction	8	ambulance		emergency	M	əmʌrdʒənsi
701	LD0021	Conduction	8	beard			N	bil
702	LD0021	Conduction	8	binoculars			N	krɔskər
703	LD0021	Conduction	8	bowl		ball	F	bɑl	duplicate
704	LD0021	Conduction	8	broom			N	brun
705	LD0021	Conduction	8	butterfly			N	bʌdərsflaɪ
706	LD0021	Conduction	8	calendar			N	kæləndən
707	LD0021	Conduction	8	cheerleaders			N	tʃilidərz
708	LD0021	Conduction	8	chimney			N	tʃɪmən
709	LD0021	Conduction	8	cowboy			N	kaʊbɔɪl
710	LD0021	Conduction	8	duck		goose	S	ɡus
711	LD0021	Conduction	8	ear		egg	O	eɡ
712	LD0021	Conduction	8	Eskimo			N	ɛnvɛs
713	LD0021	Conduction	8	fireplace			N	faɪərspres
714	LD0021	Conduction	8	glass		water	S	wɔdər	duplicate
715	LD0021	Conduction	8	hammer			N	hæməl
716	LD0021	Conduction	8	helicopter		airplane	M	erplen	duplicate
717	LD0021	Conduction	8	house			N	hænt
718	LD0021	Conduction	8	microscope		telescope	S	tɛləskop	duplicate
719	LD0021	Conduction	8	mustache			N	mʌstaʊʃ
720	LD0021	Conduction	8	necklace		chain	S	tʃen
721	LD0021	Conduction	8	pencil			N	prɛnsəl
722	LD0021	Conduction	8	pig			N	piɡ
723	LD0021	Conduction	8	pirate		parrot	F	pærət	duplicate
724	LD0021	Conduction	8	plant		flower	M	flaʊər	duplicate
725	LD0021	Conduction	8	queen		squeal	F	skwil
726	LD0021	Conduction	8	scarf			N	skærə
727	LD0021	Conduction	8	skull		skeleton	M	skɛlətən	duplicate
728	LD0021	Conduction	8	snake		snail	M	snel
729	LD0021	Conduction	8	spider			N	spaɪdəl
730	LD0021	Conduction	8	squirrel			N	skwærəl
731	LD0021	Conduction	8	stethoscope			N	stɛdəskaɪp
732	LD0021	Conduction	8	thermometer			N	tomɑmədər
733	LD0021	Conduction	8	top		spinner	S	spɪnər	duplicate
734	LD0021	Conduction	8	typewriter			N	taɪprɔɪtər
735	LD0021	Conduction	8	van		camper	M	kæmpər	duplicate
736	LD0021	Conduction	8	vest			N	væs
737	LD0021	Conduction	8	volcano		mountain	S	maʊntən	duplicate
738	LD0021	Conduction	8	well		whale	F	wel
739	LD0022	Anomic	51	anchor			AN	ʌmbrə
740	LD0022	Anomic	51	balloon			N	spəlun
741	LD0022	Anomic	51	bench		chair	S	tʃer	duplicate
742	LD0022	Anomic	51	cake		pie	S	paɪ	duplicate
743	LD0022	Anomic	51	cheerleaders		girls	M	ɡʌrlz
744	LD0022	Anomic	51	cowboy		westerner	S	wɛstərnər
745	LD0022	Anomic	51	desk		chair	S	tʃer
746	LD0022	Anomic	51	duck		fork	F	fɔrk
747	LD0022	Anomic	51	flashlight		battery	M	bætəri
748	LD0022	Anomic	51	fork		spoon	S	spun	duplicate
749	LD0022	Anomic	51	helicopter		airplane	M	erplen	duplicate
750	LD0022	Anomic	51	kite		key	F	ki
751	LD0022	Anomic	51	microscope		microphone	S	maɪkrəfon
752	LD0022	Anomic	51	mustache		hair	S	her
753	LD0022	Anomic	51	octopus		giant	S	dʒaɪənt
754	LD0022	Anomic	51	pineapple		apricot	S	æprəkɑt
755	LD0022	Anomic	51	plant		bush	S	bʊʃ
756	LD0022	Anomic	51	ruler		foot	S	fʊt
757	LD0022	Anomic	51	saddle		horse	S	hɔrs	duplicate
758	LD0022	Anomic	51	skull		head	S	hɛd	duplicate
759	LD0022	Anomic	51	snake		asp	S	æsp
760	LD0022	Anomic	51	sock		fork	F	fɔrk
761	LD0022	Anomic	51	star		char	F	tʃɑr
762	LD0022	Anomic	51	strawberries		tangerines	M	tændʒərinz
763	LD0022	Anomic	51	tent		camp	S	kæmp
764	LD0022	Anomic	51	train		railroad	M	relrod
765	LD0022	Anomic	51	van		bus	S	bʌs	duplicate
766	LD0022	Anomic	51	vest		sweater	M	swɛdər
767	LD0022	Anomic	51	wig		hairpiece	S	herpis	duplicate
768	LD0022	Anomic	51	zebra		horse	S	hɔrs	duplicate
769	LD0023	Broca	31	ambulance			N	bænʌlməns
770	LD0023	Broca	31	baby		infant	S	ɪnfənt
771	LD0023	Broca	31	binoculars			N	bɑnkətʃəz
772	LD0023	Broca	31	boot		shoe	M	ʃu	duplicate
773	LD0023	Broca	31	bottle			AN	muz
774	LD0023	Broca	31	bread			AN	sɔrə
775	LD0023	Broca	31	bus			AN	dərɑ
776	LD0023	Broca	31	butterfly			AN	ælopɪl
777	LD0023	Broca	31	cake		pie	S	paɪ	duplicate
778	LD0023	Broca	31	calendar			N	hæləndɔr
779	LD0023	Broca	31	camel			AN	ɔŋki
780	LD0023	Broca	31	camera			N	kæmə
781	LD0023	Broca	31	cannon			N	kæmən
782	LD0023	Broca	31	chimney			N	tʃɪməni
783	LD0023	Broca	31	church			N	ʃʌrʃ
784	LD0023	Broca	31	clock		time	S	taɪm
785	LD0023	Broca	31	clown		trusses	O	trʌsəs
786	LD0023	Broca	31	comb			N	spom
787	LD0023	Broca	31	crown			N	swaʊnd
788	LD0023	Broca	31	desk			N	sɛps
789	LD0023	Broca	31	door		window	S	wɪndo
790	LD0023	Broca	31	duck		swan	S	swɑn
791	LD0023	Broca	31	fireman			N	faɪrfaɪs
792	LD0023	Broca	31	frog		trinket	F	trɪŋkət
793	LD0023	Broca	31	grapes			N	ʃreps
794	LD0023	Broca	31	hair			AN	ʃaʊ
795	LD0023	Broca	31	harp		care	F	kær
796	LD0023	Broca	31	helicopter		airplane	M	erəplen
797	LD0023	Broca	31	horse			N	tɔrz
798	LD0023	Broca	31	kitchen		table	S	tebəl
799	LD0023	Broca	31	lamp			N	plæmp
800	LD0023	Broca	31	letter			N	rɛtər
801	LD0023	Broca	31	lion			N	kaɪən
802	LD0023	Broca	31	microscope			N	naɪkrəɵrop
803	LD0023	Broca	31	mustache			N	tosi
804	LD0023	Broca	31	necklace			N	nɛknəs
805	LD0023	Broca	31	nurse			N	prʌrs
806	LD0023	Broca	31	octopus			AN	swal
807	LD0023	Broca	31	owl		cow	M	kaʊ
808	LD0023	Broca	31	pear		apple	S	æpəl
809	LD0023	Broca	31	pen		pencil	M	pɛnsəl	duplicate
810	LD0023	Broca	31	pie			N	kaɪ
811	LD0023	Broca	31	pig		donkey	S	dʌŋki
812	LD0023	Broca	31	pineapple		melon	M	mɛlən
813	LD0023	Broca	31	plant		arrangement	M	rendʒmənt
814	LD0023	Broca	31	pyramid			N	pɪməmɪd
815	LD0023	Broca	31	ring		bring	F	brɪŋ
816	LD0023	Broca	31	rope			N	wop
817	LD0023	Broca	31	ruler			N	brulər
818	LD0023	Broca	31	scale		sale	F	sel
819	LD0023	Broca	31	scarf			N	sæf
820	LD0023	Broca	31	seal			AN	præps
821	LD0023	Broca	31	skis		sees	F	siz	duplicate
822	LD0023	Broca	31	skull			N	sʌlkən
823	LD0023	Broca	31	slippers		shoes	S	ʃuz	duplicate
824	LD0023	Broca	31	snail			N	kælə
825	LD0023	Broca	31	snake		spider	M	spaɪdər
826	LD0023	Broca	31	spoon		soon	F	sun
827	LD0023	Broca	31	squirrel			N	swʌrəl
828	LD0023	Broca	31	stethoscope			N	drɛsəmsop
829	LD0023	Broca	31	strawberries			N	sɔi
830	LD0023	Broca	31	suit			AN	lɛkso
831	LD0023	Broca	31	sun		moon	M	mun
832	LD0023	Broca	31	tent		club	O	klʌb
833	LD0023	Broca	31	thermometer			N	tʌmɑrəro
834	LD0023	Broca	31	toilet			N	kɔɪlət
835	LD0023	Broca	31	vase		jars	S	dʒɑrz
836	LD0023	Broca	31	vest		clothes	S	kloðz
837	LD0023	Broca	31	volcano			N	edo
838	LD0023	Broca	31	wagon			N	ræɡən
839	LD0023	Broca	31	waterfall			N	swɔʃwɔld
840	LD0023	Broca	31	well		pocket	O	pɑkət
841	LD0023	Broca	31	whistle		sew	O	so
842	LD0023	Broca	31	zebra			N	bibrə
843	LD0023	Broca	31	zipper		watch	O	wɑtʃ
844	LD0024	Wernicke	11	bench		park	S	pɑrk
845	LD0024	Wernicke	11	dice		glass	F	ɡlæs
846	LD0024	Wernicke	11	dinosaur			N	daɪməstɔr
847	LD0024	Wernicke	11	ghost		sheet	M	ʃit
848	LD0024	Wernicke	11	hair		wig	S	wɪɡ	duplicate
849	LD0024	Wernicke	11	hammer			N	hæməl	duplicate
850	LD0024	Wernicke	11	helicopter			N	hɛlikɑptər
851	LD0024	Wernicke	11	pear		pier	F	pir
852	LD0024	Wernicke	11	pen		pencil	M	pɛnsəl	duplicate
853	LD0024	Wernicke	11	piano			N	pənædo
854	LD0024	Wernicke	11	slippers		sandals	M	sændəls
855	LD0025	Conduction	12	anchor			N	æŋkwən
856	LD0025	Conduction	12	apple		calf	F	kæf
857	LD0025	Conduction	12	baby			N	doni
858	LD0025	Conduction	12	ball		umbrella	F	ʌmbrɛlə
859	LD0025	Conduction	12	balloon			N	tɛləf
860	LD0025	Conduction	12	banana		photo	O	fodo
861	LD0025	Conduction	12	basket		bone	F	bon
862	LD0025	Conduction	12	bat		bam	F	bæm
863	LD0025	Conduction	12	beard		beat	F	bit
864	LD0025	Conduction	12	bell		ring	S	rɪŋ
865	LD0025	Conduction	12	belt		coat	M	kot
866	LD0025	Conduction	12	bone		ass	O	æs
867	LD0025	Conduction	12	book			AN	fɪlf
868	LD0025	Conduction	12	boot		calms	O	kɑmz
869	LD0025	Conduction	12	bowl			AN	fɔf
870	LD0025	Conduction	12	bridge			N	brɔ
871	LD0025	Conduction	12	broom			N	brom
872	LD0025	Conduction	12	bus			AN	tæf
873	LD0025	Conduction	12	calendar		kudo	F	kudo
874	LD0025	Conduction	12	camel		camp	F	kæmp	duplicate
875	LD0025	Conduction	12	can		cause	F	kɔz
876	LD0025	Conduction	12	candle		calf	F	kæf
877	LD0025	Conduction	12	cane			N	kedo
878	LD0025	Conduction	12	carrot		umbrella	F	ʌmbrɛlə
879	LD0025	Conduction	12	cat		tone	O	ton
880	LD0025	Conduction	12	cheerleaders		boys	S	bɔɪz
881	LD0025	Conduction	12	clock		talk	F	tɔk
882	LD0025	Conduction	12	clown		crown	F	kraʊn
883	LD0025	Conduction	12	comb		cough	F	kɔf
884	LD0025	Conduction	12	corn		queen	F	kwin
885	LD0025	Conduction	12	cowboy			AN	ɛlə
886	LD0025	Conduction	12	crown		king	M	kɪŋ	duplicate
887	LD0025	Conduction	12	crutches		question	F	kwɛstʃən
888	LD0025	Conduction	12	desk		quest	F	kwɛst
889	LD0025	Conduction	12	dice		talk	O	tɔk
890	LD0025	Conduction	12	dog			N	bɔ
891	LD0025	Conduction	12	dragon		onion	F	ʌnjən
892	LD0025	Conduction	12	drum		charms	F	tʃɑrmz
893	LD0025	Conduction	12	elephant		question	F	kwɛstʃən
894	LD0025	Conduction	12	Eskimo			N	ɛləfon
895	LD0025	Conduction	12	fan		valve	F	vælv
896	LD0025	Conduction	12	fireman		phone	F	fon
897	LD0025	Conduction	12	fireplace			N	fonvɔ
898	LD0025	Conduction	12	fish		beef	O	bif
899	LD0025	Conduction	12	flashlight			AN	brʌmɛlə
900	LD0025	Conduction	12	football			N	tɛləf
901	LD0025	Conduction	12	fork		cough	F	kɔf
902	LD0025	Conduction	12	frog		fog	F	fɑɡ
903	LD0025	Conduction	12	ghost			N	ɡof
904	LD0025	Conduction	12	glass		grass	F	ɡræs
905	LD0025	Conduction	12	goat			AN	ʌbrɛlə
906	LD0025	Conduction	12	grapes		law	O	lɔ
907	LD0025	Conduction	12	hand		ham	F	hæm
908	LD0025	Conduction	12	house		question	F	kwɛstʃən
909	LD0025	Conduction	12	iron		question	F	kwɛstʃən
910	LD0025	Conduction	12	king		calf	F	kæf
911	LD0025	Conduction	12	kitchen		phone	F	fon
912	LD0025	Conduction	12	knife		fork	S	fɔrk	duplicate
913	LD0025	Conduction	12	lamp		valve	F	vælv
914	LD0025	Conduction	12	letter		question	F	kwɛstʃən
915	LD0025	Conduction	12	lion		saw	O	sɔ
916	LD0025	Conduction	12	man		girl	S	ɡʌrl
917	LD0025	Conduction	12	map		northeast	S	nɔrɵist
918	LD0025	Conduction	12	microscope			N	sʌmbrɛlə
919	LD0025	Conduction	12	mountain		telephone	F	tɛləfon
920	LD0025	Conduction	12	mustache		roam	O	rom
921	LD0025	Conduction	12	nose			N	nɛl
922	LD0025	Conduction	12	nurse		date	O	det
923	LD0025	Conduction	12	owl		valve	F	vælv
924	LD0025	Conduction	12	pear			N	pærən
925	LD0025	Conduction	12	pen		cough	O	kɔf
926	LD0025	Conduction	12	pie		comb	O	kom
927	LD0025	Conduction	12	pig			AN	kæm
928	LD0025	Conduction	12	pillow		ring	F	rɪŋ
929	LD0025	Conduction	12	pineapple		pillow	F	pɪlo
930	LD0025	Conduction	12	pirate		iron	F	aɪərn
931	LD0025	Conduction	12	pumpkin		bum	F	bʌm
932	LD0025	Conduction	12	pyramid		tomb	S	tum
933	LD0025	Conduction	12	queen		king	M	kɪŋ
934	LD0025	Conduction	12	ruler		version	O	vʌrʒən
935	LD0025	Conduction	12	sailor			N	sɔndər
936	LD0025	Conduction	12	sandwich		phone	F	fon
937	LD0025	Conduction	12	scale			AN	taʊɵ
938	LD0025	Conduction	12	shoe		suit	M	sut
939	LD0025	Conduction	12	skull			N	tʃul
940	LD0025	Conduction	12	snake		keys	O	kiz
941	LD0025	Conduction	12	sock		pill	O	pɪl
942	LD0025	Conduction	12	spoon		star	F	stɑr
943	LD0025	Conduction	12	stethoscope		question	F	kwɛstʃən
944	LD0025	Conduction	12	sun		ring	O	rɪŋ
945	LD0025	Conduction	12	tent		phone	F	fon
946	LD0025	Conduction	12	thermometer			N	ɵæmbo
947	LD0025	Conduction	12	tractor		struggle	F	strʌɡəl
948	LD0025	Conduction	12	van		valve	F	vælv
949	LD0025	Conduction	12	vest		brave	F	brev
950	LD0025	Conduction	12	wagon		woman	F	wʊmən
951	LD0025	Conduction	12	well		telephone	F	tɛləfon
952	LD0025	Conduction	12	whistle			N	kwɛstəd
953	LD0025	Conduction	12	zipper			N	kwɪŋər
954	LD0026	Anomic	2	ambulance		truck	S	trʌk	duplicate
955	LD0026	Anomic	2	beard		goatee	S	ɡoti
956	LD0026	Anomic	2	boot		galosh	S	ɡəlɑʃ
957	LD0026	Anomic	2	cheerleaders		girl	M	ɡʌrl
958	LD0026	Anomic	2	foot			N	fuk
959	LD0026	Anomic	2	helicopter		autogyro	M	ɔdodʒaɪro
960	LD0026	Anomic	2	necklace		jewelry	S	dʒulri	duplicate
961	LD0026	Anomic	2	skull		skeleton	M	skɛlətən	duplicate
962	LD0026	Anomic	2	slippers		moccasins	S	mɑkəsənz
963	LD0026	Anomic	2	wig		style	S	staɪl
964	LD0027	Broca	151	ambulance			N	æmbəlɛn
965	LD0027	Broca	151	apple		banana	S	bənænə
966	LD0027	Broca	151	balloon		kite	S	kaɪt
967	LD0027	Broca	151	bowl		cup	S	kʌp	duplicate
968	LD0027	Broca	151	cat		dog	S	dɔɡ
969	LD0027	Broca	151	celery		peas	S	piz
970	LD0027	Broca	151	cow		pony	S	poni
971	LD0027	Broca	151	dinosaur		rhinoceros	M	raɪnɑsərəs
972	LD0027	Broca	151	dragon		dinosaur	M	daɪnəsɔr	duplicate
973	LD0027	Broca	151	flower			AN	rosən
974	LD0027	Broca	151	glass		cup	S	kʌp	duplicate
975	LD0027	Broca	151	glove			N	ɡlʌbs
976	LD0027	Broca	151	goat		donkey	S	dɔŋki
977	LD0027	Broca	151	harp			N	hɑrpsəmɔrdə
978	LD0027	Broca	151	hose		spigot	S	spɪɡət
979	LD0027	Broca	151	king		princess	M	prɪnsɛs
980	LD0027	Broca	151	knife		fork	S	fɔrk	duplicate
981	LD0027	Broca	151	lamp		light	M	laɪt	duplicate
982	LD0027	Broca	151	lion		cat	S	kæt
983	LD0027	Broca	151	man		woman	M	wʊmən
984	LD0027	Broca	151	microscope			N	sudəstok
985	LD0027	Broca	151	necklace			AN	ru
986	LD0027	Broca	151	octopus		animal	S	ænəməl
987	LD0027	Broca	151	pear		apple	S	æpəl	duplicate
988	LD0027	Broca	151	piano			N	pikənæno
989	LD0027	Broca	151	pumpkin		pie	M	paɪ
990	LD0027	Broca	151	pyramid			N	pɛrəmɪdz
991	LD0027	Broca	151	queen		king	M	kɪŋ	duplicate
992	LD0027	Broca	151	ring		wedding	S	wɛdɪŋ
993	LD0027	Broca	151	rope		cord	S	kɔrd
994	LD0027	Broca	151	saddle		horse	S	hɔrs	duplicate
995	LD0027	Broca	151	seal		zebra	M	zibrə
996	LD0027	Broca	151	shoe		foot	S	fʊt	duplicate
997	LD0027	Broca	151	spoon		fork	S	fɔrk	duplicate
998	LD0027	Broca	151	stethoscope		doctor	M	dɑktər
999	LD0027	Broca	151	suit		formal	S	fɔrməl
1000	LD0027	Broca	151	sun		sunshine	S	sʌnʃaɪn
1001	LD0027	Broca	151	toilet		potty	S	pɑti
1002	LD0027	Broca	151	turkey		pigeon	S	pɪdʒən
1003	LD0027	Broca	151	van		wagon	M	wæɡən
1004	LD0027	Broca	151	vest		best	F	bɛst
1005	LD0027	Broca	151	zipper		pants	S	pænts
1006	LD0029	Anomic	72	book		Bible	M	baɪbəl
1007	LD0029	Anomic	72	boot		galoshes	S	ɡəlɑʃəz	duplicate
1008	LD0029	Anomic	72	bowl		dish	S	dɪʃ
1009	LD0029	Anomic	72	bride			N	aɪɡrum
1010	LD0029	Anomic	72	can		cane	F	ken
1011	LD0029	Anomic	72	cannon		cane	F	ken
1012	LD0029	Anomic	72	church		chapel	M	tʃæpəl
1013	LD0029	Anomic	72	clown			N	kaʊn
1014	LD0029	Anomic	72	comb		cane	F	ken
1015	LD0029	Anomic	72	cross		church	S	tʃʌrtʃ	duplicate
1016	LD0029	Anomic	72	crown		disk	O	dɪsk
1017	LD0029	Anomic	72	drum		noise	S	nɔɪz
1018	LD0029	Anomic	72	duck		swan	S	swɑn	duplicate
1019	LD0029	Anomic	72	flashlight			N	flɔʃlaɪt
1020	LD0029	Anomic	72	frog		croak	M	krok
1021	LD0029	Anomic	72	ghost		vampire	S	væmpaɪr
1022	LD0029	Anomic	72	heart		picture	O	pɪktʃər
1023	LD0029	Anomic	72	helicopter		autogyro	M	ɔdodʒaɪro	duplicate
1024	LD0029	Anomic	72	kite		hike	F	haɪk
1025	LD0029	Anomic	72	lamp		vase	S	ves
1026	LD0029	Anomic	72	letter		note	S	not
1027	LD0029	Anomic	72	microscope		telescope	S	tɛləskop	duplicate
1028	LD0029	Anomic	72	mountain		Alp	S	ælp
1029	LD0029	Anomic	72	pipe		smoke	S	smok
1030	LD0029	Anomic	72	ruler		scale	S	skel
1031	LD0029	Anomic	72	saddle			N	sedəl
1032	LD0029	Anomic	72	scale		cane	F	ken
1033	LD0029	Anomic	72	scarf		car	F	kɑr
1034	LD0029	Anomic	72	slippers		sandal	M	sændəl
1035	LD0029	Anomic	72	tent		dent	F	dɛnt
1036	LD0029	Anomic	72	top		sip	F	sɪp
1037	LD0029	Anomic	72	towel		hand	S	hænd
1038	LD0029	Anomic	72	train		railroad	M	relrod	duplicate
1039	LD0029	Anomic	72	van		minivan	S	mɪnivæn
1040	LD0029	Anomic	72	volcano		eruption	S	irʌpʃən
1041	LD0029	Anomic	72	wagon		cane	F	ken
1042	LD0030	Conduction	1	ambulance		fireman	M	faɪrmən
1043	LD0030	Conduction	1	anchor		angle	F	æŋɡəl
1044	LD0030	Conduction	1	apple		strawberry	S	strɔbɛri	duplicate
1045	LD0030	Conduction	1	ball		football	S	fʊtbɑl
1046	LD0030	Conduction	1	belt			N	bɛn
1047	LD0030	Conduction	1	bench			N	bɛntʃən
1048	LD0030	Conduction	1	book			N	bɪɡəl
1049	LD0030	Conduction	1	broom		spoon	F	spun
1050	LD0030	Conduction	1	cake		pack	F	pæk
1051	LD0030	Conduction	1	camera			N	kæmər	duplicate
1052	LD0030	Conduction	1	cane		can	F	kæn	duplicate
1053	LD0030	Conduction	1	celery		scorn	F	skɔrn
1054	LD0030	Conduction	1	cheerleaders			N	dænsnər
1055	LD0030	Conduction	1	chimney			N	tʃɪmli	duplicate
1056	LD0030	Conduction	1	church		house	S	haʊs	duplicate
1057	LD0030	Conduction	1	cross			N	kɔs
1058	LD0030	Conduction	1	crown			N	kaʊner
1059	LD0030	Conduction	1	crutches			N	ʃʌrvəl
1060	LD0030	Conduction	1	desk		chair	S	tʃer	duplicate
1061	LD0030	Conduction	1	dinosaur			N	bənɑrmə
1062	LD0030	Conduction	1	dragon		bang	F	bæŋ
1063	LD0030	Conduction	1	drum		dumb	F	dʌm	duplicate
1064	LD0030	Conduction	1	eye		bye	F	baɪ
1065	LD0030	Conduction	1	fireplace			N	ʃɛmplaɪ
1066	LD0030	Conduction	1	flashlight		pie	O	paɪ
1067	LD0030	Conduction	1	foot			N	fjuət
1068	LD0030	Conduction	1	harp		buyer	O	baɪər
1069	LD0030	Conduction	1	heart		far	F	fɑr
1070	LD0030	Conduction	1	helicopter		airplane	M	erplen	duplicate
1071	LD0030	Conduction	1	hose			AN	ʃɛvər
1072	LD0030	Conduction	1	lamp			N	kænhæm
1073	LD0030	Conduction	1	leaf		mask	O	mæsk
1074	LD0030	Conduction	1	letter			AN	tʃʌrʃ
1075	LD0030	Conduction	1	lion		hand	F	hænd
1076	LD0030	Conduction	1	nurse		sax	F	sæks
1077	LD0030	Conduction	1	pear		apple	S	æpəl	duplicate
1078	LD0030	Conduction	1	piano			N	kɛplænə
1079	LD0030	Conduction	1	pie			AN	tʃʌr
1080	LD0030	Conduction	1	plant		greens	M	ɡrinz
1081	LD0030	Conduction	1	pumpkin			N	pɔrkə
1082	LD0030	Conduction	1	pyramid			N	ɵirəmɪd
1083	LD0030	Conduction	1	queen			N	twin
1084	LD0030	Conduction	1	rake		shovel	S	ʃʌvəl
1085	LD0030	Conduction	1	ruler		school	M	skul
1086	LD0030	Conduction	1	scale		bagel	F	beɡəl
1087	LD0030	Conduction	1	scarf			N	skʌr
1088	LD0030	Conduction	1	seal			N	silaɪlən
1089	LD0030	Conduction	1	slippers		shoes	S	ʃuz	duplicate
1090	LD0030	Conduction	1	sock		shoe	S	ʃu
1091	LD0030	Conduction	1	spider		viper	M	vaɪpər
1092	LD0030	Conduction	1	spoon		spool	F	spul
1093	LD0030	Conduction	1	squirrel			N	mʌŋɡi
1094	LD0030	Conduction	1	stethoscope			N	bɛɵə
1095	LD0030	Conduction	1	suit		clothes	S	kloðz	duplicate
1096	LD0030	Conduction	1	sun			N	sɛŋ
1097	LD0030	Conduction	1	table		chair	M	tʃer
1098	LD0030	Conduction	1	tractor			N	skɔrə
1099	LD0030	Conduction	1	tree			N	traʊs
1100	LD0030	Conduction	1	van		bus	S	bʌs	duplicate
1101	LD0030	Conduction	1	vase			N	bæz
1102	LD0030	Conduction	1	vest			N	vɛs	duplicate
1103	LD0030	Conduction	1	volcano			N	vɛnkaʊnə
1104	LD0030	Conduction	1	wagon		wire	F	waɪr
1105	LD0030	Conduction	1	waterfall			N	ʃɛbər
1106	LD0030	Conduction	1	well		will	F	wɪl	duplicate
1107	LD0030	Conduction	1	wig		hair	S	her	duplicate
1108	LD0030	Conduction	1	zebra			N	zibər
1109	LD0031	Wernicke	7	anchor			AN	ɛləfə
1110	LD0031	Wernicke	7	apple		el	F	ɛl
1111	LD0031	Wernicke	7	baby		man	S	mæn
1112	LD0031	Wernicke	7	ball		butts	F	bʌts
1113	LD0031	Wernicke	7	balloon		gun	F	ɡʌn
1114	LD0031	Wernicke	7	bat			N	bʊs
1115	LD0031	Wernicke	7	beard		chin	S	tʃɪn
1116	LD0031	Wernicke	7	bell			AN	us
1117	LD0031	Wernicke	7	belt		dun	O	dʌn
1118	LD0031	Wernicke	7	bowl		scum	O	skʌm
1119	LD0031	Wernicke	7	bridge		chew	O	tʃu
1120	LD0031	Wernicke	7	broom		boom	F	bum
1121	LD0031	Wernicke	7	butterfly		elephant	M	ɛləfənt
1122	LD0031	Wernicke	7	camel			N	kim
1123	LD0031	Wernicke	7	candle		gun	F	ɡʌn
1124	LD0031	Wernicke	7	cane			N	kʌn
1125	LD0031	Wernicke	7	cannon		gun	M	ɡʌn	duplicate
1126	LD0031	Wernicke	7	carrot		sin	O	sɪn
1127	LD0031	Wernicke	7	cheerleaders			N	wisɪt
1128	LD0031	Wernicke	7	church			N	ʃʌr
1129	LD0031	Wernicke	7	clown			N	saʊn
1130	LD0031	Wernicke	7	comb		cane	F	ken	duplicate
1131	LD0031	Wernicke	7	corn			N	hɛləpɛn
1132	LD0031	Wernicke	7	cowboy		dune	O	dun
1133	LD0031	Wernicke	7	cross			N	kɪli
1134	LD0031	Wernicke	7	crown		soon	F	sun
1135	LD0031	Wernicke	7	crutches			AN	waɪrmə
1136	LD0031	Wernicke	7	dice		sword	F	sɔrd
1137	LD0031	Wernicke	7	dinosaur		elephant	S	ɛləfənt
1138	LD0031	Wernicke	7	dog			N	jɔ
1139	LD0031	Wernicke	7	door			AN	wɛs
1140	LD0031	Wernicke	7	dragon			AN	ɛləfos
1141	LD0031	Wernicke	7	duck		gun	F	ɡʌn
1142	LD0031	Wernicke	7	fan		gun	F	ɡʌn
1143	LD0031	Wernicke	7	fireman		horse	F	hɔrs
1144	LD0031	Wernicke	7	fireplace			AN	wɪs
1145	LD0031	Wernicke	7	fish			N	sɪʃ
1146	LD0031	Wernicke	7	flashlight		slash	F	slæʃ
1147	LD0031	Wernicke	7	flower			N	fle
1148	LD0031	Wernicke	7	foot			AN	sɪnə
1149	LD0031	Wernicke	7	frog		baseball	O	bæsbɔl
1150	LD0031	Wernicke	7	ghost			N	kus
1151	LD0031	Wernicke	7	glass			N	ɡæ
1152	LD0031	Wernicke	7	glove		saw	O	sɔ
1153	LD0031	Wernicke	7	goat			N	hɔrt
1154	LD0031	Wernicke	7	grapes			N	ɡɛn
1155	LD0031	Wernicke	7	hair		with	O	wɪɵ
1156	LD0031	Wernicke	7	hammer			N	sæld
1157	LD0031	Wernicke	7	hat		cow	O	kaʊ
1158	LD0031	Wernicke	7	helicopter			N	hedu
1159	LD0031	Wernicke	7	hose		shoes	F	ʃuz
1160	LD0031	Wernicke	7	iron		ant	F	ænt
1161	LD0031	Wernicke	7	key			N	kɛl
1162	LD0031	Wernicke	7	knife		gun	S	ɡʌn
1163	LD0031	Wernicke	7	letter		elephant	F	ɛləfənt
1164	LD0031	Wernicke	7	map		ambulance	F	æmbəlæns
1165	LD0031	Wernicke	7	monkey			AN	ɛləbən
1166	LD0031	Wernicke	7	mountain			N	mɔntən
1167	LD0031	Wernicke	7	nose		tar	O	tɔr
1168	LD0031	Wernicke	7	nurse			N	ɡwæst
1169	LD0031	Wernicke	7	owl		wet	O	wɛt
1170	LD0031	Wernicke	7	pen		can	F	kæn
1171	LD0031	Wernicke	7	pencil		bed	F	bɛd
1172	LD0031	Wernicke	7	pie			AN	ɡʌr
1173	LD0031	Wernicke	7	pillow			AN	hɔ
1174	LD0031	Wernicke	7	pirate			N	pʌtʃ
1175	LD0031	Wernicke	7	plant			N	sæn
1176	LD0031	Wernicke	7	pumpkin		pie	M	paɪ	duplicate
1177	LD0031	Wernicke	7	queen			AN	ʃju
1178	LD0031	Wernicke	7	saddle		horse	S	hɔrs	duplicate
1179	LD0031	Wernicke	7	sailor		soldier	M	soldʒər	duplicate
1180	LD0031	Wernicke	7	sandwich			AN	iʃ
1181	LD0031	Wernicke	7	saw		snail	F	snel
1182	LD0031	Wernicke	7	scale		shore	O	ʃɔr
1183	LD0031	Wernicke	7	scarf		shoes	S	ʃuz
1184	LD0031	Wernicke	7	scissors		key	O	ki
1185	LD0031	Wernicke	7	seal			AN	ʃʊs
1186	LD0031	Wernicke	7	skis		shoes	S	ʃuz
1187	LD0031	Wernicke	7	skull		snow	F	sno
1188	LD0031	Wernicke	7	slippers		dress	M	drɛs
1189	LD0031	Wernicke	7	snail		ban	O	bæn
1190	LD0031	Wernicke	7	sock		sore	F	sɔr
1191	LD0031	Wernicke	7	spoon			N	sær
1192	LD0031	Wernicke	7	strawberries			N	ɵɑksiz
1193	LD0031	Wernicke	7	suit		dress	S	drɛs
1194	LD0031	Wernicke	7	sun			N	swɛs
1195	LD0031	Wernicke	7	tent			AN	æl
1196	LD0031	Wernicke	7	toilet		one	O	wʌn
1197	LD0031	Wernicke	7	top			AN	ɛləjusəs
1198	LD0031	Wernicke	7	tractor		wagon	M	wæɡən
1199	LD0031	Wernicke	7	typewriter			AN	ɛlɛfən
1200	LD0031	Wernicke	7	van			N	æləfən
1201	LD0031	Wernicke	7	vase			AN	lænk
1202	LD0031	Wernicke	7	wagon		wait	F	wet
1203	LD0031	Wernicke	7	waterfall			AN	sændu
1204	LD0031	Wernicke	7	well		what	F	wʌt
1205	LD0031	Wernicke	7	whistle			N	waɪdɛf
1206	LD0031	Wernicke	7	window		doors	S	dɔrz
1207	LD0031	Wernicke	7	zipper		seam	O	sim
1208	LD0032	Broca	128	ambulance			N	æmjulənk
1209	LD0032	Broca	128	balloon			N	bəlu
1210	LD0032	Broca	128	bat		dragon	M	ɡræɡon
1211	LD0032	Broca	128	belt		bless	F	blɛs
1212	LD0032	Broca	128	binoculars			N	bəlætuləs
1213	LD0032	Broca	128	boot			N	bups
1214	LD0032	Broca	128	bowl		bone	F	bon
1215	LD0032	Broca	128	bride		church	S	tʃʌrtʃ
1216	LD0032	Broca	128	camel		kangaroo	M	kæŋɡəru
1217	LD0032	Broca	128	carrot		food	S	fud
1218	LD0032	Broca	128	crown		cray	F	kre
1219	LD0032	Broca	128	desk		chair	S	tʃer	duplicate
1220	LD0032	Broca	128	dice		craps	S	kræps
1221	LD0032	Broca	128	dinosaur		zebra	S	zibrə
1222	LD0032	Broca	128	drum			AN	bɛndu
1223	LD0032	Broca	128	duck			AN	is
1224	LD0032	Broca	128	fan			N	fɪ
1225	LD0032	Broca	128	fish			N	fɪtʃ
1226	LD0032	Broca	128	foot			AN	pʌtɛsi
1227	LD0032	Broca	128	garage		burr	F	bʌr
1228	LD0032	Broca	128	glove		scarf	S	skɑrf
1229	LD0032	Broca	128	grapes			N	ɡræbi
1230	LD0032	Broca	128	harp		ham	F	hæm
1231	LD0032	Broca	128	helicopter		plane	M	plen	duplicate
1232	LD0032	Broca	128	hose			AN	suit
1233	LD0032	Broca	128	iron			AN	frʌp
1234	LD0032	Broca	128	key		door	S	dɔr
1235	LD0032	Broca	128	kite		cane	F	ken
1236	LD0032	Broca	128	knife		spoon	S	spun
1237	LD0032	Broca	128	lamp			AN	wot
1238	LD0032	Broca	128	lion			AN	ɡeŋɡʌri
1239	LD0032	Broca	128	microscope			N	tɛtɑmɪtər
1240	LD0032	Broca	128	nose		ear	S	ir
1241	LD0032	Broca	128	pen		branch	F	bræntʃ
1242	LD0032	Broca	128	pie		cake	S	kek
1243	LD0032	Broca	128	pineapple		banana	M	bənænə
1244	LD0032	Broca	128	pirate			N	paɪət
1245	LD0032	Broca	128	plant		spoon	F	spun
1246	LD0032	Broca	128	queen		wife	S	waɪf
1247	LD0032	Broca	128	ruler			AN	bɔ
1248	LD0032	Broca	128	saddle		horses	S	hɔrsəz
1249	LD0032	Broca	128	sailor		services	M	sʌrvɪsəz
1250	LD0032	Broca	128	saw		hammer	S	hæmər
1251	LD0032	Broca	128	shoe		foot	S	fʊt	duplicate
1252	LD0032	Broca	128	slippers		shoe	S	ʃu	duplicate
1253	LD0032	Broca	128	sock			N	sɛdə
1254	LD0032	Broca	128	star		rectangle	M	rɛktæŋɡəl
1255	LD0032	Broca	128	stethoscope			AN	dəɑmətər
1256	LD0032	Broca	128	table		chair	M	tʃer	duplicate
1257	LD0032	Broca	128	thermometer		umbrella	F	ʌmbrɛlə
1258	LD0032	Broca	128	towel			AN	ko
1259	LD0032	Broca	128	tractor		truck	M	krʌk
1260	LD0032	Broca	128	train		truck	M	krʌk
1261	LD0032	Broca	128	tree		brush	F	brʌʃ
1262	LD0032	Broca	128	van		truck	S	trʌk
1263	LD0032	Broca	128	wagon			N	kwe
1264	LD0032	Broca	128	waterfall			N	fækəl
1265	LD0032	Broca	128	wig		comb	S	kom
1266	LD0032	Broca	128	window			N	hendʒəs
1267	LD0033	Conduction	2	anchor		hook	S	hʊk
1268	LD0033	Conduction	2	baby			N	baɪndə
1269	LD0033	Conduction	2	banana		camp	O	kæmp
1270	LD0033	Conduction	2	bed			N	bɛŋ
1271	LD0033	Conduction	2	binoculars			N	æklir
1272	LD0033	Conduction	2	butterfly			N	bʌdərfle
1273	LD0033	Conduction	2	camera			N	kæmən
1274	LD0033	Conduction	2	cane		key	F	ki
1275	LD0033	Conduction	2	celery		carrots	S	kerəts
1276	LD0033	Conduction	2	crown			N	kaʊn
1277	LD0033	Conduction	2	dinosaur			N	daɪnəʃɔr
1278	LD0033	Conduction	2	dog		duck	M	dʌk	duplicate
1279	LD0033	Conduction	2	duck		dunk	F	dʌŋk
1280	LD0033	Conduction	2	ear		knee	S	ni
1281	LD0033	Conduction	2	elephant			N	ʌfənt
1282	LD0033	Conduction	2	Eskimo			N	ɛsko
1283	LD0033	Conduction	2	fork			AN	skrɑ
1284	LD0033	Conduction	2	grapes			N	ɡwepfɛl
1285	LD0033	Conduction	2	hair		care	F	ker
1286	LD0033	Conduction	2	harp			N	spɑrt
1287	LD0033	Conduction	2	king		key	F	ki
1288	LD0033	Conduction	2	leaf		leave	F	liv	duplicate
1289	LD0033	Conduction	2	microscope			N	stɑpət
1290	LD0033	Conduction	2	monkey			N	mʊ
1291	LD0033	Conduction	2	mountain			N	kaʊntən
1292	LD0033	Conduction	2	necklace			N	nɑkslə
1293	LD0033	Conduction	2	nose		moon	O	mun
1294	LD0033	Conduction	2	nurse			N	snʌrt
1295	LD0033	Conduction	2	piano			N	piænə
1296	LD0033	Conduction	2	pillow			N	puzəl
1297	LD0033	Conduction	2	pirate		buccaneer	S	bʌkənir
1298	LD0033	Conduction	2	pumpkin		punk	F	pʌŋk
1299	LD0033	Conduction	2	ruler		school	M	skul	duplicate
1300	LD0033	Conduction	2	saddle		sandal	F	sændəl
1301	LD0033	Conduction	2	sailor			N	saɪljər
1302	LD0033	Conduction	2	saw		song	F	sɔŋ
1303	LD0033	Conduction	2	scarf			N	skɑrs
1304	LD0033	Conduction	2	slippers			N	sændəz
1305	LD0033	Conduction	2	spider			N	snaɪdə
1306	LD0033	Conduction	2	squirrel		school	F	skul
1307	LD0033	Conduction	2	sun		mere	O	mir
1308	LD0033	Conduction	2	table		cable	F	kebəl
1309	LD0033	Conduction	2	towel		washcloth	S	wɑʃklɔɵ
1310	LD0033	Conduction	2	train		tree	F	tri
1311	LD0033	Conduction	2	typewriter			N	taɪpwaɪdər
1312	LD0033	Conduction	2	vest		fence	F	fɛns
1313	LD0033	Conduction	2	wagon			N	wæŋən
1314	LD0033	Conduction	2	waterfall		dam	S	dæm
1315	LD0034	Wernicke	1	anchor		able	F	ebəl
1316	LD0034	Wernicke	1	balloon		ball	F	bɔl
1317	LD0034	Wernicke	1	bat		plan	F	plæn
1318	LD0034	Wernicke	1	beard			N	bɪs
1319	LD0034	Wernicke	1	bench		pen	F	pɛn
1320	LD0034	Wernicke	1	binoculars			N	lʌbstɪk
1321	LD0034	Wernicke	1	boot		judge	O	dʒʌdʒ
1322	LD0034	Wernicke	1	bowl			AN	dʒʌd
1323	LD0034	Wernicke	1	bread		ice	S	aɪs
1324	LD0034	Wernicke	1	bridge		nice	O	naɪs
1325	LD0034	Wernicke	1	bus		butt	F	bʌt
1326	LD0034	Wernicke	1	butterfly			N	bɛlərə
1327	LD0034	Wernicke	1	camera			N	fælə
1328	LD0034	Wernicke	1	candle		legal	F	liɡəl
1329	LD0034	Wernicke	1	cane		ten	F	tɛn
1330	LD0034	Wernicke	1	cat		Indian	O	ɪndiən
1331	LD0034	Wernicke	1	celery			N	ɵʌrəks
1332	LD0034	Wernicke	1	cheerleaders			N	hɛlpi
1333	LD0034	Wernicke	1	church		maid	O	med
1334	LD0034	Wernicke	1	clock		stun	O	stʌn
1335	LD0034	Wernicke	1	clown		India	O	ɪndiə
1336	LD0034	Wernicke	1	corn		engine	F	ɛndʒɪn
1337	LD0034	Wernicke	1	cross		ate	O	et
1338	LD0034	Wernicke	1	crown		shirt	S	ʃʌrt
1339	LD0034	Wernicke	1	desk		serve	O	sʌrv
1340	LD0034	Wernicke	1	dice		nails	O	nelz
1341	LD0034	Wernicke	1	dragon		ball	O	bɔl
1342	LD0034	Wernicke	1	elephant		salad	F	sæləd
1343	LD0034	Wernicke	1	Eskimo			N	ɑskən
1344	LD0034	Wernicke	1	fireman		engine	F	ɛndʒɪn
1345	LD0034	Wernicke	1	fork			AN	aɪsətɛn
1346	LD0034	Wernicke	1	frog		air	O	er
1347	LD0034	Wernicke	1	garage		phone	O	fon
1348	LD0034	Wernicke	1	glass			N	sʌl
1349	LD0034	Wernicke	1	glove		height	O	haɪt
1350	LD0034	Wernicke	1	hat			AN	maʊf
1351	LD0034	Wernicke	1	heart		start	F	stɑrt
1352	LD0034	Wernicke	1	helicopter			AN	ɑlstə
1353	LD0034	Wernicke	1	hose		stove	F	stov
1354	LD0034	Wernicke	1	key		aids	O	eds
1355	LD0034	Wernicke	1	kitchen			AN	tʌbəl
1356	LD0034	Wernicke	1	kite		lamp	O	læmp
1357	LD0034	Wernicke	1	lamp		thunder	O	ɵʌndər
1358	LD0034	Wernicke	1	leaf		lops	F	lɑps
1359	LD0034	Wernicke	1	letter		age	O	edʒ
1360	LD0034	Wernicke	1	lion		ache	O	ek
1361	LD0034	Wernicke	1	monkey			N	hotmi
1362	LD0034	Wernicke	1	mustache			N	pʌtʃ
1363	LD0034	Wernicke	1	nail		owl	F	aʊl
1364	LD0034	Wernicke	1	nose			N	nowə
1365	LD0034	Wernicke	1	octopus			N	lɑbsəs
1366	LD0034	Wernicke	1	owl			AN	æsko
1367	LD0034	Wernicke	1	pear			N	henz
1368	LD0034	Wernicke	1	pig		stung	O	stʌŋ
1369	LD0034	Wernicke	1	pillow		head	S	hɛd
1370	LD0034	Wernicke	1	plant		flowers	M	flaʊərz	duplicate
1371	LD0034	Wernicke	1	rake		fen	O	fɛn
1372	LD0034	Wernicke	1	rope		soap	F	sop
1373	LD0034	Wernicke	1	saddle		bed	O	bɛd
1374	LD0034	Wernicke	1	seal		suit	F	sut
1375	LD0034	Wernicke	1	skull		lice	F	laɪs
1376	LD0034	Wernicke	1	slippers		sit	F	sɪt
1377	LD0034	Wernicke	1	spider		knife	F	naɪf
1378	LD0034	Wernicke	1	spoon		soap	F	sop
1379	LD0034	Wernicke	1	squirrel			AN	tunu
1380	LD0034	Wernicke	1	star		aid	O	ed
1381	LD0034	Wernicke	1	strawberries			N	sɔrɵrot
1382	LD0034	Wernicke	1	suit		ship	O	ʃɪp
1383	LD0034	Wernicke	1	sun			N	sof
1384	LD0034	Wernicke	1	table			AN	jʌn
1385	LD0034	Wernicke	1	tent			AN	jær
1386	LD0034	Wernicke	1	thermometer			N	ɵʌrbət
1387	LD0034	Wernicke	1	toilet		sun	O	sʌn
1388	LD0034	Wernicke	1	train		saw	O	sɔ
1389	LD0034	Wernicke	1	vase			N	dʌs
1390	LD0034	Wernicke	1	volcano		asses	O	æsəz
1391	LD0034	Wernicke	1	wagon			N	jʌlən
1392	LD0034	Wernicke	1	well		stubble	F	stʌbəl
1393	LD0034	Wernicke	1	whistle			AN	lʌb
1394	LD0034	Wernicke	1	window		lice	O	laɪs
1395	LD0034	Wernicke	1	zebra		basil	F	bezəl
1396	LD0035	Anomic	15	bench		chair	S	tʃer	duplicate
1397	LD0035	Anomic	15	candle			N	kæ
1398	LD0035	Anomic	15	fireman		hone	F	hon
1399	LD0035	Anomic	15	flower		bower	F	baʊər
1400	LD0035	Anomic	15	grapes		fruit	M	frut	duplicate
1401	LD0035	Anomic	15	helicopter		airplane	M	erplen	duplicate
1402	LD0035	Anomic	15	key		lock	S	lɑk
1403	LD0035	Anomic	15	pencil		pence	F	pɛns
1404	LD0035	Anomic	15	pumpkin		apple	S	æpəl
1405	LD0035	Anomic	15	pyramid		tent	O	tɛnt
1406	LD0035	Anomic	15	slippers		shoe	S	ʃu	duplicate
1407	LD0035	Anomic	15	snail		bee	S	bi
1408	LD0035	Anomic	15	squirrel		rodent	S	rodənt
1409	LD0035	Anomic	15	train		car	S	kɑr
1410	LD0035	Anomic	15	van		car	S	kɑr
1411	LD0035	Anomic	15	wagon		woo	F	wu
1412	LD0036	Wernicke	133	ambulance		umbrella	F	ʌmbrɛlə
1413	LD0036	Wernicke	133	apple		grape	S	ɡrep
1414	LD0036	Wernicke	133	balloon		umbrella	F	ʌmbrɛlə
1415	LD0036	Wernicke	133	basket		books	F	bʊks
1416	LD0036	Wernicke	133	bench		seat	S	sit
1417	LD0036	Wernicke	133	bone		cork	O	kɔrk
1418	LD0036	Wernicke	133	book		brook	F	brʊk
1419	LD0036	Wernicke	133	bottle		glass	S	ɡlæs
1420	LD0036	Wernicke	133	bowl		yoke	F	jok
1421	LD0036	Wernicke	133	bread		pear	M	per
1422	LD0036	Wernicke	133	bridge		tunnel	S	tʌnəl
1423	LD0036	Wernicke	133	broom		swing	O	swɪŋ
1424	LD0036	Wernicke	133	bus		burst	F	bʌrst
1425	LD0036	Wernicke	133	butterfly			N	bidərflo
1426	LD0036	Wernicke	133	cake		pie	S	paɪ	duplicate
1427	LD0036	Wernicke	133	calendar		umbrella	F	ʌmbrɛlə
1428	LD0036	Wernicke	133	cannon			N	kæmrən
1429	LD0036	Wernicke	133	carrot		grape	S	ɡrep
1430	LD0036	Wernicke	133	celery		socks	F	sɑks
1431	LD0036	Wernicke	133	clock		maim	O	mem
1432	LD0036	Wernicke	133	clown		joker	S	dʒokər
1433	LD0036	Wernicke	133	comb		umbrella	F	ʌmbrɛlə
1434	LD0036	Wernicke	133	corn		cheers	O	tʃirz
1435	LD0036	Wernicke	133	cross		police	F	pəlis
1436	LD0036	Wernicke	133	crown		king	M	kɪŋ	duplicate
1437	LD0036	Wernicke	133	crutches			N	kɔrns
1438	LD0036	Wernicke	133	dice		craps	S	kræps	duplicate
1439	LD0036	Wernicke	133	dog		tiger	S	taɪɡər
1440	LD0036	Wernicke	133	dragon		whale	S	wel
1441	LD0036	Wernicke	133	Eskimo			AN	kænə
1442	LD0036	Wernicke	133	football		umbrella	F	ʌmbrɛlə
1443	LD0036	Wernicke	133	ghost		screw	O	skru
1444	LD0036	Wernicke	133	glove		hand	S	hænd	duplicate
1445	LD0036	Wernicke	133	grapes		peach	S	pitʃ
1446	LD0036	Wernicke	133	helicopter			AN	æksəm
1447	LD0036	Wernicke	133	hose		nose	F	noz
1448	LD0036	Wernicke	133	house		home	M	hom	duplicate
1449	LD0036	Wernicke	133	iron			AN	bʌrs
1450	LD0036	Wernicke	133	knife		fork	S	fɔrk	duplicate
1451	LD0036	Wernicke	133	lamp		glass	F	ɡlæs
1452	LD0036	Wernicke	133	letter			N	rædərz
1453	LD0036	Wernicke	133	lion		tiger	M	taɪɡər	duplicate
1454	LD0036	Wernicke	133	microscope		doctor	M	dɑktər
1455	LD0036	Wernicke	133	mountain		lions	F	laɪənz
1456	LD0036	Wernicke	133	necklace		purse	F	pʌrs
1457	LD0036	Wernicke	133	pen		pencil	M	pɛnsəl	duplicate
1458	LD0036	Wernicke	133	pie		apple	S	æpəl	duplicate
1459	LD0036	Wernicke	133	pig		peach	F	pitʃ
1460	LD0036	Wernicke	133	pineapple			AN	brɛlə
1461	LD0036	Wernicke	133	plant		flower	M	flaʊər	duplicate
1462	LD0036	Wernicke	133	rake		craw	O	krɔ
1463	LD0036	Wernicke	133	ruler		scale	S	skel	duplicate
1464	LD0036	Wernicke	133	saddle		horse	S	hɔrs	duplicate
1465	LD0036	Wernicke	133	sailor		soldier	M	soldʒər	duplicate
1466	LD0036	Wernicke	133	sandwich			N	sæmbrədʒ
1467	LD0036	Wernicke	133	scale		weight	M	wet	duplicate
1468	LD0036	Wernicke	133	scarf		swallow	F	swɑlo
1469	LD0036	Wernicke	133	shoe		foot	S	fʊt	duplicate
1470	LD0036	Wernicke	133	skull		head	S	hɛd	duplicate
1471	LD0036	Wernicke	133	slippers		socks	M	sɑks	duplicate
1472	LD0036	Wernicke	133	spoon		fork	S	fɔrk	duplicate
1473	LD0036	Wernicke	133	star		number	F	nʌmbər
1474	LD0036	Wernicke	133	suit		sweater	M	swɛdər
1475	LD0036	Wernicke	133	tent		tank	F	tæŋk
1476	LD0036	Wernicke	133	toilet		bathroom	S	bæɵrum	duplicate
1477	LD0036	Wernicke	133	typewriter			N	taɪtəlaɪdər
1478	LD0036	Wernicke	133	van		car	S	kɑr	duplicate
1479	LD0036	Wernicke	133	wagon		bang	F	bæŋ
1480	LD0036	Wernicke	133	well			N	wɛɡ
1481	LD0038	Conduction	21	apple			AN	ɡrɛp
1482	LD0038	Conduction	21	bat		why	O	waɪ
1483	LD0038	Conduction	21	binoculars			AN	ɡosət
1484	LD0038	Conduction	21	bus			N	bos
1485	LD0038	Conduction	21	calendar		colander	F	kɑləndər
1486	LD0038	Conduction	21	cannon		talk	O	tɔk
1487	LD0038	Conduction	21	celery		lettuce	M	lɛtəs	duplicate
1488	LD0038	Conduction	21	cheerleaders		girls	M	ɡʌrlz	duplicate
1489	LD0038	Conduction	21	chimney		top	O	tɑp
1490	LD0038	Conduction	21	comb			N	konm
1491	LD0038	Conduction	21	cowboy			AN	bʌsəlʌm
1492	LD0038	Conduction	21	crown		clown	F	klaʊn	duplicate
1493	LD0038	Conduction	21	crutches		cane	M	ken
1494	LD0038	Conduction	21	dinosaur			N	ɡɑlərsɛm
1495	LD0038	Conduction	21	door		closet	S	klɑzət
1496	LD0038	Conduction	21	dragon		walrus	S	wɑlrəs
1497	LD0038	Conduction	21	Eskimo			AN	hæmət
1498	LD0038	Conduction	21	fork			AN	plʌkən
1499	LD0038	Conduction	21	frog		karate	F	kərɑti
1500	LD0038	Conduction	21	helicopter		autogyro	M	ɔtodʒaɪro
1501	LD0038	Conduction	21	house		fan	O	fæn
1502	LD0038	Conduction	21	iron			N	ɑmən
1503	LD0038	Conduction	21	microscope			N	haɪdrono
1504	LD0038	Conduction	21	octopus			N	lɑkətɛl
1505	LD0038	Conduction	21	owl		pigeon	S	pɪdʒən
1506	LD0038	Conduction	21	pillow		handkerchief	O	hæŋkərtʃəf
1507	LD0038	Conduction	21	plant		flower	M	flaʊər	duplicate
1508	LD0038	Conduction	21	pyramid		corner	F	kɔrnər
1509	LD0038	Conduction	21	queen		lady	S	ledi	duplicate
1510	LD0038	Conduction	21	rope		cord	S	kɔrd	duplicate
1511	LD0038	Conduction	21	ruler		measure	M	mɛʒər
1512	LD0038	Conduction	21	sailor		man	S	mæn	duplicate
1513	LD0038	Conduction	21	seal		whale	M	wel	duplicate
1514	LD0038	Conduction	21	skull		hum	F	hʌm
1515	LD0038	Conduction	21	snail		eskimo	O	ɛskəmo
1516	LD0038	Conduction	21	spider		butterfly	M	bʌdərflaɪ
1517	LD0038	Conduction	21	squirrel			N	kwʌrəl
1518	LD0038	Conduction	21	stethoscope			N	stɛsəskop
1519	LD0038	Conduction	21	thermometer			N	hæfmən
1520	LD0038	Conduction	21	top		ball	S	bɑl
1521	LD0038	Conduction	21	tractor			N	kemər
1522	LD0038	Conduction	21	van		car	S	kɑr	duplicate
1523	LD0038	Conduction	21	volcano		Vesuvius	S	vəsuviəs
1524	LD0038	Conduction	21	well		train	O	tren
1525	LD0038	Conduction	21	wig			AN	herhʌrkəl
1526	LD0038	Conduction	21	window		scan	F	skæn
1527	LD0038	Conduction	21	zebra			AN	maɪsə
1528	LD0038	Conduction	21	zipper			N	fʌrmətʃər
1529	LD0039	Wernicke	1	banana			N	bənʌ
1530	LD0039	Wernicke	1	basket		sunk	F	sʌŋk
1531	LD0039	Wernicke	1	bed		beck	F	bɛk
1532	LD0039	Wernicke	1	book			N	brʊt
1533	LD0039	Wernicke	1	bread		cake	S	kek
1534	LD0039	Wernicke	1	bride		wedding	S	wɛdɪŋ
1535	LD0039	Wernicke	1	bridge			N	bʌrəst
1536	LD0039	Wernicke	1	broom		brush	M	brʌʃ
1537	LD0039	Wernicke	1	bus		car	S	kɑr
1538	LD0039	Wernicke	1	camel			N	hɑməd
1539	LD0039	Wernicke	1	camera		flash	M	flæʃ
1540	LD0039	Wernicke	1	chair		stall	O	stɔl
1541	LD0039	Wernicke	1	chimney			N	tʃʌmdə
1542	LD0039	Wernicke	1	cowboy		soldier	S	soldʒər
1543	LD0039	Wernicke	1	desk		vest	F	vɛst
1544	LD0039	Wernicke	1	dice			N	dɑkət
1545	LD0039	Wernicke	1	dragon		China	S	tʃaɪnʌ
1546	LD0039	Wernicke	1	drum			N	bʌnbɑnə
1547	LD0039	Wernicke	1	duck		kit	O	kɪt
1548	LD0039	Wernicke	1	fireplace		foyer	M	fɔiər
1549	LD0039	Wernicke	1	flashlight			N	flæʃneər
1550	LD0039	Wernicke	1	fork		spun	O	spʌn
1551	LD0039	Wernicke	1	grapes		trips	F	trɪps
1552	LD0039	Wernicke	1	harp			N	flɑn
1553	LD0039	Wernicke	1	iron			N	erən
1554	LD0039	Wernicke	1	kite		flutter	O	flʌtər
1555	LD0039	Wernicke	1	lion		tiger	M	taɪɡər	duplicate
1556	LD0039	Wernicke	1	microscope		microphone	S	maɪkrəfon	duplicate
1557	LD0039	Wernicke	1	mustache			N	spʌntʃəz
1558	LD0039	Wernicke	1	pie		cake	S	kek	duplicate
1559	LD0039	Wernicke	1	plant		flower	M	flaʊər	duplicate
1560	LD0039	Wernicke	1	pyramid			AN	səwets
1561	LD0039	Wernicke	1	rake		bride	F	braɪd
1562	LD0039	Wernicke	1	ring			N	ʃɪŋk
1563	LD0039	Wernicke	1	ruler		centimeter	M	sɛntəmitər
1564	LD0039	Wernicke	1	sailor			N	sɑlərmæn
1565	LD0039	Wernicke	1	seal		sail	F	sel
1566	LD0039	Wernicke	1	skull		trash	O	træʃ
1567	LD0039	Wernicke	1	snail		turkey	S	tʌrki
1568	LD0039	Wernicke	1	snake			AN	bɑ
1569	LD0039	Wernicke	1	spider		crumb	O	krʌm
1570	LD0039	Wernicke	1	squirrel			N	trʌskʌlu
1571	LD0039	Wernicke	1	tent		dent	F	dɛnt	duplicate
1572	LD0039	Wernicke	1	toilet		bathroom	S	bæɵrum	duplicate
1573	LD0039	Wernicke	1	towel			AN	tʃʌndnər
1574	LD0039	Wernicke	1	tractor			N	tɑɡər
1575	LD0039	Wernicke	1	wagon			N	vɑɡu
1576	LD0039	Wernicke	1	waterfall			N	wɔtərspʌrt
1577	LD0039	Wernicke	1	well		wane	F	wen
1578	LD0039	Wernicke	1	whistle			N	fɪsəl
1579	LD0039	Wernicke	1	wig		hair	S	her	duplicate
1580	LD0039	Wernicke	1	zebra		horse	S	hɔrs	duplicate
1581	LD0039	Wernicke	1	zipper		simmer	F	sɪmər
1582	LD0041	Wernicke	2	ambulance			AN	rʌŋkər
1583	LD0041	Wernicke	2	apple		rabbit	F	ræbət
1584	LD0041	Wernicke	2	baby		battle	F	bædəl
1585	LD0041	Wernicke	2	ball			N	bɑlt
1586	LD0041	Wernicke	2	balloon		basket	F	bæskət
1587	LD0041	Wernicke	2	basket			N	bʌŋkəther
1588	LD0041	Wernicke	2	beard		weird	F	wird
1589	LD0041	Wernicke	2	bell		bunch	F	bʌntʃ
1590	LD0041	Wernicke	2	bench			N	ʃɛpər
1591	LD0041	Wernicke	2	bone		dog	S	dɔɡ
1592	LD0041	Wernicke	2	bottle		battle	F	bædəl	duplicate
1593	LD0041	Wernicke	2	bowl			N	mɪlkbɔ
1594	LD0041	Wernicke	2	bread		rattle	F	rædəl
1595	LD0041	Wernicke	2	bridge		rabbit	F	ræbət
1596	LD0041	Wernicke	2	broom			AN	herkɛt
1597	LD0041	Wernicke	2	bus			N	bʌŋkən
1598	LD0041	Wernicke	2	butterfly		hospital	O	hɑspɪdəl
1599	LD0041	Wernicke	2	calendar			N	bætherd
1600	LD0041	Wernicke	2	camel		battles	F	bædəlz
1601	LD0041	Wernicke	2	camera			AN	baʊə
1602	LD0041	Wernicke	2	can			N	bʌŋkən
1603	LD0041	Wernicke	2	candle			N	ɪŋɡəl
1604	LD0041	Wernicke	2	cannon		log	O	lɑɡ
1605	LD0041	Wernicke	2	carrot		rabbit	M	ræbət
1606	LD0041	Wernicke	2	church			N	herhæt
1607	LD0041	Wernicke	2	comb			AN	læpər
1608	LD0041	Wernicke	2	corn		hair	F	her
1609	LD0041	Wernicke	2	cow		cat	M	kæt
1610	LD0041	Wernicke	2	cowboy		captain	M	kæptən
1611	LD0041	Wernicke	2	cross			N	krɪs
1612	LD0041	Wernicke	2	crutches			N	kæpsənz
1613	LD0041	Wernicke	2	desk		dog	F	dɔɡ
1614	LD0041	Wernicke	2	dice			N	dʌts
1615	LD0041	Wernicke	2	dinosaur			N	æpəldir
1616	LD0041	Wernicke	2	dog			AN	retən
1617	LD0041	Wernicke	2	door			AN	ʃɪphɛl
1618	LD0041	Wernicke	2	dragon		rabbit	F	ræbət
1619	LD0041	Wernicke	2	drum		loves	F	lʌvz
1620	LD0041	Wernicke	2	duck		dog	M	dɔɡ
1621	LD0041	Wernicke	2	ear			N	kædəlbir
1622	LD0041	Wernicke	2	Eskimo			N	bʌŋki
1623	LD0041	Wernicke	2	fan			N	blænkən
1624	LD0041	Wernicke	2	fireplace		bottle	O	bɑtəl
1625	LD0041	Wernicke	2	foot		bat	F	bæt
1626	LD0041	Wernicke	2	football			N	dɔɡlif
1627	LD0041	Wernicke	2	frog		flecks	F	flɛks
1628	LD0041	Wernicke	2	garage			AN	kædəlfir
1629	LD0041	Wernicke	2	ghost			AN	mʌŋkən
1630	LD0041	Wernicke	2	glass		air	O	er
1631	LD0041	Wernicke	2	glove		flag	F	flæɡ
1632	LD0041	Wernicke	2	goat		camel	S	kæməl
1633	LD0041	Wernicke	2	hammer		battle	F	bædəl
1634	LD0041	Wernicke	2	hand		deer	O	dir
1635	LD0041	Wernicke	2	helicopter			N	bʌrdræp
1636	LD0041	Wernicke	2	horse		rabbit	S	ræbət
1637	LD0041	Wernicke	2	king			N	ʃɪʃræbət
1638	LD0041	Wernicke	2	kitchen		flinch	F	flɪntʃ
1639	LD0041	Wernicke	2	knife			AN	læŋkən
1640	LD0041	Wernicke	2	leaf			N	kætflɪŋk
1641	LD0041	Wernicke	2	lion		donkey	S	dʌŋki
1642	LD0041	Wernicke	2	monkey		dog	S	dɔɡ
1643	LD0041	Wernicke	2	mustache		skin	S	skɪn
1644	LD0041	Wernicke	2	nose		hair	S	her
1645	LD0041	Wernicke	2	octopus			AN	ræɡəfit
1646	LD0041	Wernicke	2	owl			AN	boəir
1647	LD0041	Wernicke	2	pencil			AN	bædəbɪʃɪp
1648	LD0041	Wernicke	2	pig		rabbit	S	ræbət
1649	LD0041	Wernicke	2	pineapple		banana	M	bənænə	duplicate
1650	LD0041	Wernicke	2	pipe			AN	kætlət
1651	LD0041	Wernicke	2	plant		hat	F	hæt
1652	LD0041	Wernicke	2	pumpkin			N	ʌpələn
1653	LD0041	Wernicke	2	pyramid			AN	faɪkən
1654	LD0041	Wernicke	2	rake			AN	flʌŋkət
1655	LD0041	Wernicke	2	ring			AN	hætirlɛd
1656	LD0041	Wernicke	2	rope			AN	kir
1657	LD0041	Wernicke	2	ruler		wren	F	rɛn
1658	LD0041	Wernicke	2	saddle			N	kæpən
1659	LD0041	Wernicke	2	sailor		dote	O	dot
1660	LD0041	Wernicke	2	saw			AN	herfæn
1661	LD0041	Wernicke	2	scissors			N	flir
1662	LD0041	Wernicke	2	seal		monkey	S	mʌŋki
1663	LD0041	Wernicke	2	shoe		catfish	O	kætfɪʃ
1664	LD0041	Wernicke	2	skull		scalp	M	skælp
1665	LD0041	Wernicke	2	slippers			AN	baʊəsɪŋk
1666	LD0041	Wernicke	2	snail		trap	O	træp
1667	LD0041	Wernicke	2	snake		rabbit	S	ræbət
1668	LD0041	Wernicke	2	sock		sneaks	M	sniks
1669	LD0041	Wernicke	2	spider			N	maɪkoər
1670	LD0041	Wernicke	2	squirrel		dog	S	dɔɡ
1671	LD0041	Wernicke	2	star		flower	F	flaʊər
1672	LD0041	Wernicke	2	strawberries			N	blækəlir
1673	LD0041	Wernicke	2	suit		doggie	O	dɔɡi
1674	LD0041	Wernicke	2	table			N	ʃæbət
1675	LD0041	Wernicke	2	tent		lamp	O	læmp
1676	LD0041	Wernicke	2	toilet			AN	pɑəlkən
1677	LD0041	Wernicke	2	top			AN	bʌŋkə
1678	LD0041	Wernicke	2	towel		loaf	O	lof
1679	LD0041	Wernicke	2	tractor			N	kætraɪdər
1680	LD0041	Wernicke	2	train		rabbit	F	ræbət
1681	LD0041	Wernicke	2	tree		wheat	F	wit
1682	LD0041	Wernicke	2	turkey			N	bʌɡət
1683	LD0041	Wernicke	2	van		rabbit	F	ræbət
1684	LD0041	Wernicke	2	vase			AN	boʃɪp
1685	LD0041	Wernicke	2	vest			AN	skʌlp
1686	LD0041	Wernicke	2	wagon			N	haʊɡlaʊn
1687	LD0041	Wernicke	2	well			N	ræpəl
1688	LD0041	Wernicke	2	whistle		battle	F	bædəl
1689	LD0041	Wernicke	2	zipper			AN	dirfʌŋki
1690	LD0042	Anomic	29	bowl		cup	S	kʌp	duplicate
1691	LD0042	Anomic	29	bus		van	S	væn
1692	LD0042	Anomic	29	butterfly		flower	M	flaʊər	duplicate
1693	LD0042	Anomic	29	camera		photo	S	foto
1694	LD0042	Anomic	29	desk		bench	M	bɛntʃ
1695	LD0042	Anomic	29	helicopter		plane	M	plen	duplicate
1696	LD0042	Anomic	29	knife		fork	S	fɔrk	duplicate
1697	LD0042	Anomic	29	letter		mail	S	mel
1698	LD0042	Anomic	29	plant		flowers	M	flaʊərz	duplicate
1699	LD0042	Anomic	29	ruler		scale	M	skel
1700	LD0042	Anomic	29	slippers		shoes	S	ʃuz	duplicate
1701	LD0042	Anomic	29	stethoscope			N	sɛdəskop
1702	LD0042	Anomic	29	top		tots	F	tɑts
1703	LD0042	Anomic	29	typewriter			N	taɪplaɪdər
1704	LD0042	Anomic	29	vase		bowl	S	bol
1705	LD0042	Anomic	29	well		will	F	wɪl	duplicate
1706	LD0043	Conduction	2	bed			N	bʌ
1707	LD0043	Conduction	2	boot		shoe	M	ʃu	duplicate
1708	LD0043	Conduction	2	broom			N	brufs
1709	LD0043	Conduction	2	candle		light	S	laɪt	duplicate
1710	LD0043	Conduction	2	celery		wreck	F	rɛk
1711	LD0043	Conduction	2	dinosaur			N	dino
1712	LD0043	Conduction	2	foot		hand	S	hænd
1713	LD0043	Conduction	2	king		price	O	praɪs
1714	LD0043	Conduction	2	map		mat	F	mæt
1715	LD0043	Conduction	2	microscope			N	maɪkrosɑp
1716	LD0043	Conduction	2	nurse			N	nitʃ
1717	LD0043	Conduction	2	pineapple			N	kænæpəl
1718	LD0043	Conduction	2	plant		flower	M	flaʊər	duplicate
1719	LD0043	Conduction	2	rake			N	ref
1720	LD0043	Conduction	2	ruler		yardstick	S	jɑrdstɪk
1721	LD0043	Conduction	2	scale		weigher	M	we
1722	LD0043	Conduction	2	scarf			N	skɔf
1723	LD0043	Conduction	2	scissors			N	hɪzər
1724	LD0043	Conduction	2	slippers		shoes	S	ʃuz	duplicate
1725	LD0043	Conduction	2	stethoscope			N	stɛfəskop
1726	LD0043	Conduction	2	thermometer		thermostat	S	ɵʌrməstæt
1727	LD0043	Conduction	2	tractor		trailer	M	trelər
1728	LD0044	Wernicke	9	ambulance		car	S	kɑr
1729	LD0044	Wernicke	9	anchor			N	æŋkwə
1730	LD0044	Wernicke	9	basket		bicker	F	bɪkər
1731	LD0044	Wernicke	9	bat			N	bʌsk
1732	LD0044	Wernicke	9	beard			N	brɪd
1733	LD0044	Wernicke	9	belt			N	bʌdə
1734	LD0044	Wernicke	9	bench			N	bɛnətʃ
1735	LD0044	Wernicke	9	binoculars			N	bənækə
1736	LD0044	Wernicke	9	bone		bug	F	bʌɡ
1737	LD0044	Wernicke	9	book		bass	F	bæs
1738	LD0044	Wernicke	9	boot		foot	M	fʊt
1739	LD0044	Wernicke	9	bottle			N	bɑdəri
1740	LD0044	Wernicke	9	bowl		cup	S	kʌp	duplicate
1741	LD0044	Wernicke	9	bread		fly	O	flaɪ
1742	LD0044	Wernicke	9	broom		mop	S	mɑp
1743	LD0044	Wernicke	9	butterfly		buffalo	M	bʌfəlo
1744	LD0044	Wernicke	9	camel		can	F	kæn
1745	LD0044	Wernicke	9	candle		fire	S	faɪr
1746	LD0044	Wernicke	9	cane			AN	tʌs
1747	LD0044	Wernicke	9	carrot			N	kæbrət
1748	LD0044	Wernicke	9	cat		car	F	kɑr
1749	LD0044	Wernicke	9	celery			N	sɛləwə
1750	LD0044	Wernicke	9	cheerleaders		girls	M	ɡʌrlz	duplicate
1751	LD0044	Wernicke	9	chimney			N	tʃənil
1752	LD0044	Wernicke	9	clock			N	klaɪ
1753	LD0044	Wernicke	9	closet		clip-clop	F	klɪpklɑp
1754	LD0044	Wernicke	9	clown			N	klaʊ
1755	LD0044	Wernicke	9	cowboy		coffee	F	cɔfi
1756	LD0044	Wernicke	9	cross		car	F	kɑr
1757	LD0044	Wernicke	9	crown		key	F	ki
1758	LD0044	Wernicke	9	crutches		trapped	F	træpt
1759	LD0044	Wernicke	9	dice		flies	F	flaɪz
1760	LD0044	Wernicke	9	dinosaur			N	dɛntæɡrə
1761	LD0044	Wernicke	9	dragon			N	dænəs
1762	LD0044	Wernicke	9	drum			N	drʌmp
1763	LD0044	Wernicke	9	duck		dug	F	dʌɡ
1764	LD0044	Wernicke	9	elephant		snow	O	sno
1765	LD0044	Wernicke	9	Eskimo			N	ɛləkæmp
1766	LD0044	Wernicke	9	fan		fog	F	fɑɡ
1767	LD0044	Wernicke	9	fireman		feather	F	fɛðər
1768	LD0044	Wernicke	9	fireplace			N	faɪɡər
1769	LD0044	Wernicke	9	fish		flower	F	flaʊər
1770	LD0044	Wernicke	9	flashlight			N	rʌfplɛs
1771	LD0044	Wernicke	9	fork			N	flɑt
1772	LD0044	Wernicke	9	ghost			N	skoləs
1773	LD0044	Wernicke	9	glove			N	bʌstri
1774	LD0044	Wernicke	9	goat		donkey	S	dɔŋki	duplicate
1775	LD0044	Wernicke	9	grapes		gropes	F	ɡrops
1776	LD0044	Wernicke	9	hair		fire	O	faɪr
1777	LD0044	Wernicke	9	hammer		handle	M	hændəl
1778	LD0044	Wernicke	9	heart			AN	fæləko
1779	LD0044	Wernicke	9	helicopter			AN	bænjər
1780	LD0044	Wernicke	9	hose		water	S	wɔdər	duplicate
1781	LD0044	Wernicke	9	king		fall	O	fɑl
1782	LD0044	Wernicke	9	knife		night	F	naɪt
1783	LD0044	Wernicke	9	lamp		ladder	F	lædər
1784	LD0044	Wernicke	9	leaf		bears	O	bærz
1785	LD0044	Wernicke	9	letter			N	lætə
1786	LD0044	Wernicke	9	lion			N	loəs
1787	LD0044	Wernicke	9	mustache		mush	F	mʌʃ
1788	LD0044	Wernicke	9	nail			N	nedəl
1789	LD0044	Wernicke	9	nose			N	nos
1790	LD0044	Wernicke	9	nurse		news	F	nuz
1791	LD0044	Wernicke	9	pen			AN	taɪs
1792	LD0044	Wernicke	9	pencil		pillar	F	pɪlər
1793	LD0044	Wernicke	9	piano			AN	traɪoɡ
1794	LD0044	Wernicke	9	pillow		travel	O	trævəl
1795	LD0044	Wernicke	9	pineapple			N	pɪnkwes
1796	LD0044	Wernicke	9	pipe		pen	F	pɛn
1797	LD0044	Wernicke	9	pirate		vat	O	væt
1798	LD0044	Wernicke	9	plant		flowers	M	flaʊərz	duplicate
1799	LD0044	Wernicke	9	pumpkin			N	pʌpkən
1800	LD0044	Wernicke	9	queen		key	F	ki
1801	LD0044	Wernicke	9	rake			N	rɛsk
1802	LD0044	Wernicke	9	ring		row	F	ro
1803	LD0044	Wernicke	9	rope			N	rʌs
1804	LD0044	Wernicke	9	saddle			N	hæn
1805	LD0044	Wernicke	9	saw		sow	F	saʊ
1806	LD0044	Wernicke	9	scarf			N	skrʌ
1807	LD0044	Wernicke	9	seal		sue	F	su
1808	LD0044	Wernicke	9	skull			N	skɛlən
1809	LD0044	Wernicke	9	slippers			N	fʌðərz
1810	LD0044	Wernicke	9	snail		snug	F	snʌɡ
1811	LD0044	Wernicke	9	snake			N	snɑ
1812	LD0044	Wernicke	9	sock		sips	F	sɪps
1813	LD0044	Wernicke	9	spider		sand	F	sænd
1814	LD0044	Wernicke	9	spoon		sandwich	F	sændwɪtʃ
1815	LD0044	Wernicke	9	squirrel			N	smɛðər
1816	LD0044	Wernicke	9	star		straw	F	strɔ
1817	LD0044	Wernicke	9	stethoscope			N	sɑnəmə
1818	LD0044	Wernicke	9	suit			N	sot
1819	LD0044	Wernicke	9	sun		sum	F	sʌm
1820	LD0044	Wernicke	9	table		pail	F	pel
1821	LD0044	Wernicke	9	tent			N	tɛs
1822	LD0044	Wernicke	9	thermometer			AN	tuti
1823	LD0044	Wernicke	9	toilet		hank	O	hæŋk
1824	LD0044	Wernicke	9	towel		peg	O	pɛɡ
1825	LD0044	Wernicke	9	tractor		trench	F	trɛntʃ
1826	LD0044	Wernicke	9	train		try	F	traɪ
1827	LD0044	Wernicke	9	tree			AN	faɪ
1828	LD0044	Wernicke	9	turkey			N	tʌɡi
1829	LD0044	Wernicke	9	typewriter			N	tutæ
1830	LD0044	Wernicke	9	vase		vail	F	vel
1831	LD0044	Wernicke	9	vest			AN	fɪðər
1832	LD0044	Wernicke	9	wagon		ladder	F	lædər
1833	LD0044	Wernicke	9	waterfall			N	swɔtər
1834	LD0044	Wernicke	9	well		flaw	O	flɔ
1835	LD0044	Wernicke	9	whistle			N	wɛnsəl
1836	LD0044	Wernicke	9	window			AN	obrə
1837	LD0044	Wernicke	9	zebra			N	zeɡə
1838	LD0045	Anomic	55	bat		squirrel	S	skwʌrəl
1839	LD0045	Anomic	55	bench		chair	S	tʃer	duplicate
1840	LD0045	Anomic	55	binoculars			N	baɪɡlæsəz
1841	LD0045	Anomic	55	boot		shoes	M	ʃuz	duplicate
1842	LD0045	Anomic	55	butterfly		flower	M	flaʊər	duplicate
1843	LD0045	Anomic	55	cake		pie	S	paɪ	duplicate
1844	LD0045	Anomic	55	calendar		almanac	M	ɑlmənæk
1845	LD0045	Anomic	55	cheerleaders		volleyball	F	vɑlibɑl
1846	LD0045	Anomic	55	ghost		book	O	bʊk
1847	LD0045	Anomic	55	glass		water	S	wɔdər	duplicate
1848	LD0045	Anomic	55	helicopter		periscope	F	pɛrəskop
1849	LD0045	Anomic	55	house		cabin	S	kæbɪn
1850	LD0045	Anomic	55	lamp		light	M	laɪt	duplicate
1851	LD0045	Anomic	55	microscope		stethoscope	S	stɛɵəskop
1852	LD0045	Anomic	55	pirate		fire	F	faɪr
1853	LD0045	Anomic	55	pumpkin		pineapple	M	paɪnæpəl
1854	LD0045	Anomic	55	slippers		shoes	S	snoʃuz
1855	LD0045	Anomic	55	strawberries			AN	æpəlzbəz
1856	LD0045	Anomic	55	top			N	tɪpi
1857	LD0045	Anomic	55	tractor		bicycle	S	baɪsəkəl
1858	LD0045	Anomic	55	vest		foot	F	fʊt
1859	LD0045	Anomic	55	wig		hair	S	her	duplicate
1860	LD0046	Anomic	1	ambulance			N	faɪrmænsərə
1861	LD0046	Anomic	1	boot		shoes	M	ʃuz	duplicate
1862	LD0046	Anomic	1	bottle		glass	S	ɡlæs	duplicate
1863	LD0046	Anomic	1	cake		pie	S	paɪ	duplicate
1864	LD0046	Anomic	1	cannon		can	F	kæn
1865	LD0046	Anomic	1	crown		skins	F	skɪnz
1866	LD0046	Anomic	1	foot		shoes	S	ʃuz
1867	LD0046	Anomic	1	house		home	M	hom	duplicate
1868	LD0046	Anomic	1	lamp		light	M	laɪt	duplicate
1869	LD0046	Anomic	1	lion		lick	F	lɪk
1870	LD0046	Anomic	1	necklace		bracelet	M	breslət	duplicate
1871	LD0046	Anomic	1	pear		pip	F	pɪp
1872	LD0046	Anomic	1	pipe		cigar	S	səɡɑr
1873	LD0046	Anomic	1	plant		flowers	M	flaʊərz	duplicate
1874	LD0046	Anomic	1	pyramid		desert	S	dɛzərt
1875	LD0046	Anomic	1	rope		pay	O	pe
1876	LD0046	Anomic	1	slippers		shoes	S	ʃuz	duplicate
1877	LD0046	Anomic	1	vase		globe	O	ɡlob
1878	LD0046	Anomic	1	vest		shirt	M	ʃʌrt
1879	LD0046	Anomic	1	wig		hairdo	S	herdu	duplicate
1880	LD0048	Conduction	74	ball			N	bʌməl
1881	LD0048	Conduction	74	basket			N	bæɡət
1882	LD0048	Conduction	74	beard		beer	F	bir	duplicate
1883	LD0048	Conduction	74	bed		house	O	haʊs
1884	LD0048	Conduction	74	belt		bank	F	bæŋk
1885	LD0048	Conduction	74	bench			AN	kif
1886	LD0048	Conduction	74	binoculars			N	ɑrərækər
1887	LD0048	Conduction	74	book		bible	M	baɪbəl	duplicate
1888	LD0048	Conduction	74	boot		bush	F	bʊʃ
1889	LD0048	Conduction	74	bottle		cup	S	kʌp
1890	LD0048	Conduction	74	bowl		cap	O	kæp
1891	LD0048	Conduction	74	bride		wedding	S	wɛdɪŋ	duplicate
1892	LD0048	Conduction	74	bridge		bush	F	bʊʃ
1893	LD0048	Conduction	74	bus		van	S	væn	duplicate
1894	LD0048	Conduction	74	butterfly			N	bʌrdk
1895	LD0048	Conduction	74	calendar			N	kæmbəl
1896	LD0048	Conduction	74	camera		pictures	S	pɪktʃərz
1897	LD0048	Conduction	74	candle		temple	F	tɛmpəl
1898	LD0048	Conduction	74	cannon			N	kænəl
1899	LD0048	Conduction	74	carrot		cabbage	M	kæbədʒ
1900	LD0048	Conduction	74	celery		tree	F	tri
1901	LD0048	Conduction	74	chair		cash	O	kæʃ
1902	LD0048	Conduction	74	chimney		keys	F	kiz
1903	LD0048	Conduction	74	clock		cap	F	kæp
1904	LD0048	Conduction	74	closet			AN	trɛlo
1905	LD0048	Conduction	74	clown		cow	F	kaʊ
1906	LD0048	Conduction	74	corn		key	F	ki
1907	LD0048	Conduction	74	cow		hog	S	hɑɡ
1908	LD0048	Conduction	74	cross		caw	F	kɔ
1909	LD0048	Conduction	74	crown		king	M	kɪŋ	duplicate
1910	LD0048	Conduction	74	dice		gang	S	ɡæŋɡ
1911	LD0048	Conduction	74	dinosaur		gorilla	S	ɡərɪlə
1912	LD0048	Conduction	74	dragon			N	faɪrdræɡər
1913	LD0048	Conduction	74	drum		band	S	bænd
1914	LD0048	Conduction	74	duck		dirt	F	dʌrt
1915	LD0048	Conduction	74	Eskimo		people	S	pipəl
1916	LD0048	Conduction	74	fan			N	kwæn
1917	LD0048	Conduction	74	fireplace			N	faɪrple
1918	LD0048	Conduction	74	flashlight			N	fæʃ
1919	LD0048	Conduction	74	fork		key	O	ki
1920	LD0048	Conduction	74	ghost		go	F	ɡo
1921	LD0048	Conduction	74	glass		water	S	wɔdər	duplicate
1922	LD0048	Conduction	74	glove		blow	F	blo
1923	LD0048	Conduction	74	grapes			N	ɡrips
1924	LD0048	Conduction	74	helicopter			N	kɑləsækər
1925	LD0048	Conduction	74	horse			N	kɔ
1926	LD0048	Conduction	74	hose		rose	F	roz
1927	LD0048	Conduction	74	iron			N	ɑrən
1928	LD0048	Conduction	74	king		key	F	ki	duplicate
1929	LD0048	Conduction	74	kitchen		click	F	klɪk
1930	LD0048	Conduction	74	kite		cow	F	kaʊ
1931	LD0048	Conduction	74	lamp		train	O	tren
1932	LD0048	Conduction	74	leaf		tree	M	tri
1933	LD0048	Conduction	74	microscope			N	maɪko
1934	LD0048	Conduction	74	nail		pen	O	pɛn
1935	LD0048	Conduction	74	necklace		bow	O	baʊ
1936	LD0048	Conduction	74	octopus			N	ɑktə
1937	LD0048	Conduction	74	pear		pie	M	paɪ
1938	LD0048	Conduction	74	pen		pencil	M	pɛnsəl	duplicate
1939	LD0048	Conduction	74	pig		hog	M	hɑɡ
1940	LD0048	Conduction	74	pillow		mumble	O	mʌmbəl
1941	LD0048	Conduction	74	pineapple			N	ænʌpəæpəl
1942	LD0048	Conduction	74	pipe		cigar	S	sɪɡɑr
1943	LD0048	Conduction	74	plant		flowers	M	flaʊərz	duplicate
1944	LD0048	Conduction	74	pumpkin		bacon	M	bekən
1945	LD0048	Conduction	74	pyramid			N	trɪmbə
1946	LD0048	Conduction	74	queen			N	kwɪnə
1947	LD0048	Conduction	74	rake		grass	F	ɡræs
1948	LD0048	Conduction	74	rope		coat	F	kot
1949	LD0048	Conduction	74	ruler		measure	M	mɛʒər	duplicate
1950	LD0048	Conduction	74	saddle			N	keɡəl
1951	LD0048	Conduction	74	sailor		willow	F	wɪlo
1952	LD0048	Conduction	74	sandwich		ham	M	hæm
1953	LD0048	Conduction	74	saw		sue	F	su
1954	LD0048	Conduction	74	scale		weight	M	wet	duplicate
1955	LD0048	Conduction	74	scarf		pass	O	pæs
1956	LD0048	Conduction	74	scissors		type	O	taɪp
1957	LD0048	Conduction	74	seal			N	zibro
1958	LD0048	Conduction	74	shoe		trees	O	triz
1959	LD0048	Conduction	74	skull		head	S	hɛd	duplicate
1960	LD0048	Conduction	74	snail		sail	F	sel
1961	LD0048	Conduction	74	spider		kink	O	kɪŋk
1962	LD0048	Conduction	74	spoon			AN	ko
1963	LD0048	Conduction	74	squirrel		bird	M	bʌrd
1964	LD0048	Conduction	74	stethoscope		elephant	F	ɛləfənt
1965	LD0048	Conduction	74	strawberries		berries	S	bɛriz
1966	LD0048	Conduction	74	tent		tank	F	tæŋk	duplicate
1967	LD0048	Conduction	74	thermometer			AN	ʌndəfon
1968	LD0048	Conduction	74	top		car	O	kɑr
1969	LD0048	Conduction	74	tractor		track	F	træk
1970	LD0048	Conduction	74	train		truck	M	trʌk
1971	LD0048	Conduction	74	typewriter		tiger	F	taɪɡər
1972	LD0048	Conduction	74	vase		vowel	F	vaʊl
1973	LD0048	Conduction	74	vest			AN	kɪm
1974	LD0048	Conduction	74	volcano			N	vælkɑno
1975	LD0048	Conduction	74	wagon		window	F	wɪndo
1976	LD0048	Conduction	74	waterfall		stream	S	strim
1977	LD0048	Conduction	74	whistle			N	wɪzəl
1978	LD0049	Anomic	4	ambulance		totality	F	totæləti
1979	LD0049	Anomic	4	anchor		torpedo	O	tɔrpido
1980	LD0049	Anomic	4	balloon		light	O	laɪt
1981	LD0049	Anomic	4	banana		fruit	S	frut
1982	LD0049	Anomic	4	bench		chair	S	tʃer	duplicate
1983	LD0049	Anomic	4	binoculars			N	bʌkhɛd
1984	LD0049	Anomic	4	calendar		water	F	wɔder
1985	LD0049	Anomic	4	cannon		candle	F	kændəl
1986	LD0049	Anomic	4	carrot		rat	F	ræt
1987	LD0049	Anomic	4	cheerleaders		girls	M	ɡʌrlz	duplicate
1988	LD0049	Anomic	4	closet		cabinet	M	kæbənət
1989	LD0049	Anomic	4	corn		pot	O	pɑt
1990	LD0049	Anomic	4	cow		pig	S	pɪɡ
1991	LD0049	Anomic	4	dice		mass	F	mæs
1992	LD0049	Anomic	4	dinosaur			N	rɑkəsɔrəs
1993	LD0049	Anomic	4	drum		fun	F	fʌn
1994	LD0049	Anomic	4	fireplace		lights	M	laɪts
1995	LD0049	Anomic	4	glove			AN	fɔrf
1996	LD0049	Anomic	4	microscope		macedonia	F	mæsədoniə
1997	LD0049	Anomic	4	mountain		miracle	F	mɪrəkəl
1998	LD0049	Anomic	4	nail			AN	bʌkhɛd
1999	LD0049	Anomic	4	necklace		petal	F	pɛtəl
[truncated: 10,000 more rows]
